# Supplementary material for: Low-dose IL-2 reduces IL-21+ T cell frequency and induces anti-inflammatory gene expression in type 1 diabetes
Source: PubMed Central journal article supplement (PMC9705541; doi:10.1038/s41467-022-34162-3), 2022-11-28
Supplement: 41467_2022_34162_MOESM1_ESM.pdf [file 41467_2022_34162_MOESM1_ESM.pdf]

# Low-dose IL-2 reduces IL-21<sup>+</sup> T cell frequency and induces anti-inflammatory gene expression in type 1 diabetes

Jia-Yuan Zhang<sup>1</sup>, Fiona Hamey<sup>1</sup>, Dominik Trzuppek<sup>1</sup>, Marius Mickunas<sup>2</sup>, Mercedes Lee<sup>1</sup>, Leila Godfrey<sup>1</sup>, Jennie H.M. Yang<sup>2</sup>, Marcin L Pekalski<sup>1</sup>, Jane Kennet<sup>3,4</sup>, Frank Waldron-Lynch<sup>5</sup>, Mark L. Evans<sup>3,4</sup>, Timothy I. M. Tree<sup>2</sup>, Linda S. Wicker<sup>1</sup>, John A. Todd<sup>1</sup> and Ricardo C. Ferreira<sup>1</sup>

<sup>1</sup> JDRF/Wellcome Diabetes and Inflammation Laboratory, Wellcome Centre for Human Genetics, Nuffield Department of Medicine, NIHR Oxford Biomedical Research Centre, University of Oxford, Oxford, United Kingdom.

<sup>2</sup> Department of Immunobiology, King's College London, School of Immunology and Microbial Sciences, London, United Kingdom.

<sup>3</sup> Wellcome-MRC Institute of Metabolic Science, Metabolic Research Laboratories, University of Cambridge, Cambridge, United Kingdom.

<sup>4</sup> National Institute for Health Research Cambridge Biomedical Research Centre, Addenbrooke's Biomedical Campus, Cambridge, United Kingdom.

<sup>5</sup> Vertex Pharmaceuticals, Vertex Cell & Gene Therapies, Boston, Massachusetts, United States of America.

**Supplementary Figures 1-15**

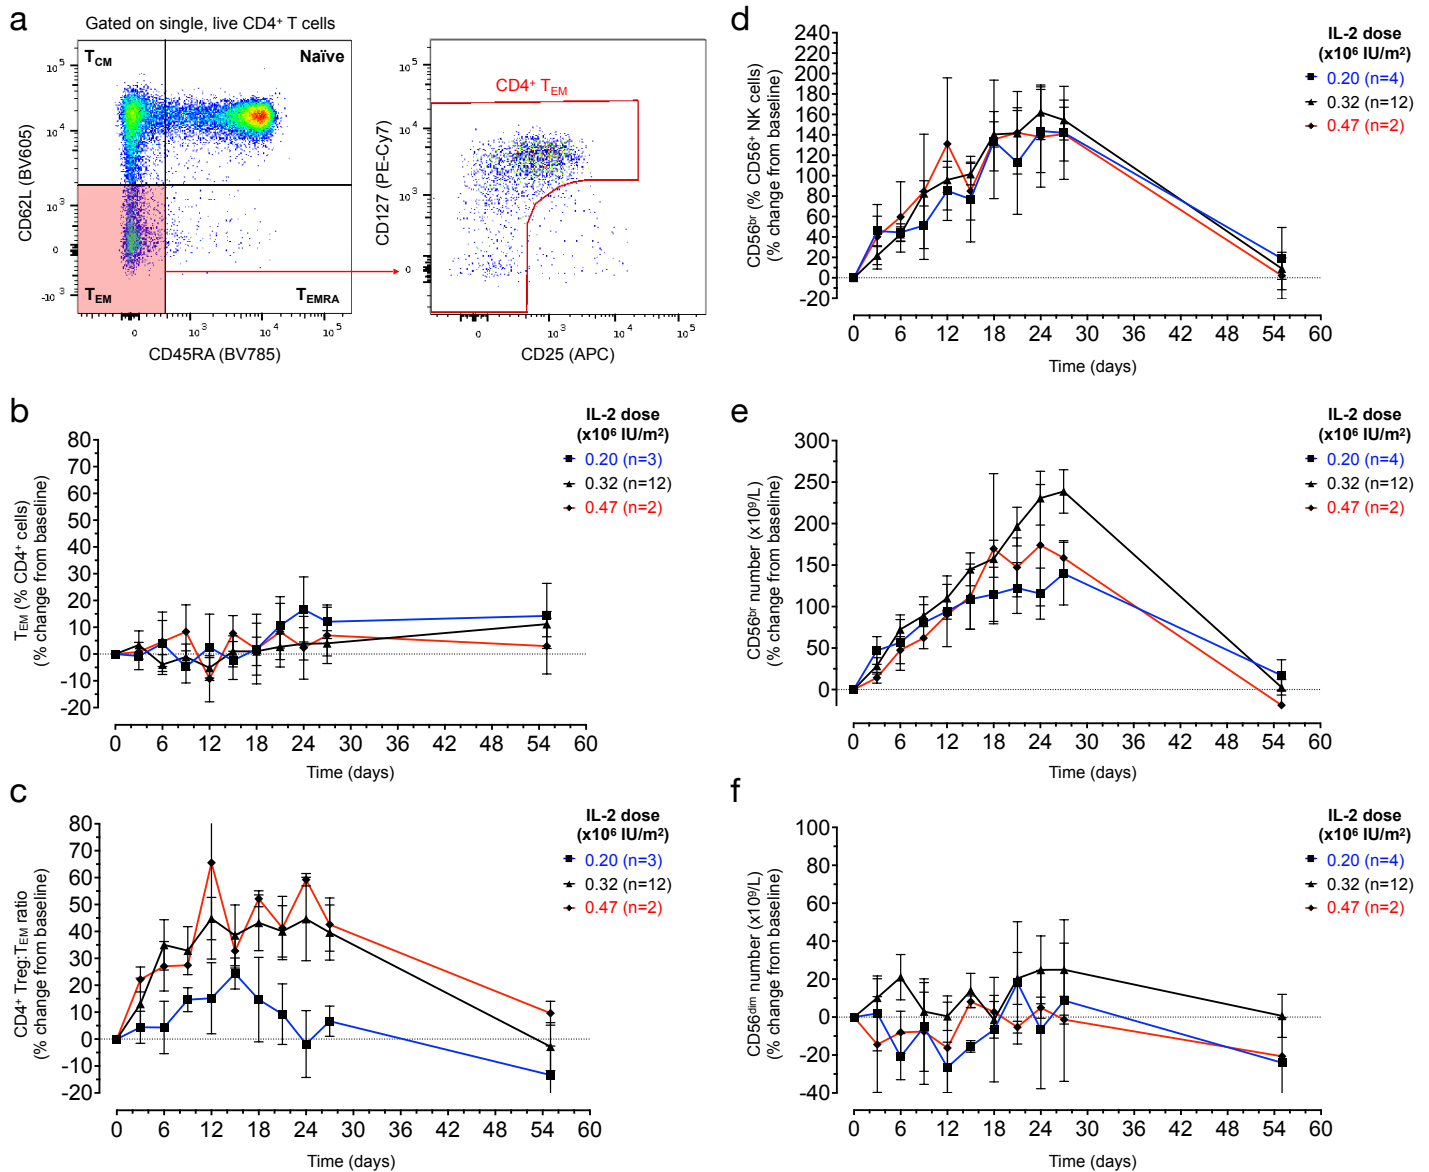

Supplementary Figure 1. Flow cytometric characterisation of the effector memory CD4<sup>+</sup> T and CD56<sup>+</sup> NK cell populations.

**a**, Gating strategy for the delineation of CD4<sup>+</sup> effector memory T cells (T<sub>EM</sub>). **b-c**, Variation (depicted as the % change from pre-treatment baseline levels) in the frequency of CD4<sup>+</sup> T<sub>EM</sub> (**b**), or the ratio between CD4<sup>+</sup> Tregs and T<sub>EM</sub> cells (**c**) during the study. Baseline levels (mean values +/- SEM): CD4<sup>+</sup> T<sub>EM</sub> = 10.4% +/- 1.39; CD4<sup>+</sup> Treg:T<sub>EM</sub> ratio = 0.76 +/- 0.07. **d-f**, Variation (depicted as the % change from pre-treatment baseline levels) in the relative frequency of CD56<sup>br</sup> NK cells within the total CD3<sup>-</sup>CD56<sup>+</sup> NK cell gate (**d**), and in the absolute number of CD56<sup>br</sup> (**e**) and CD56<sup>dim</sup> (**f**) NK cells in blood during the study. Baseline levels (mean values +/- SEM): CD56<sup>br</sup> = 6.2% +/- 0.55; CD56<sup>br</sup> number (x10<sup>9</sup>/L) = 0.011 +/- 0.001; CD56<sup>dim</sup> Number (x10<sup>9</sup>/L) = 0.18 +/- 0.02. In **b-f**, frequencies of the assessed immune subsets were determined by flow cytometry in n = 18 DILfrequency participants treated with the 3-day interval dosing schedule. Data are presented as mean values +/- SEM of the assessed immune subsets at each visit and were stratified according to the IL-2 dose. Source data for **b-f** are provided as a Source Data file.

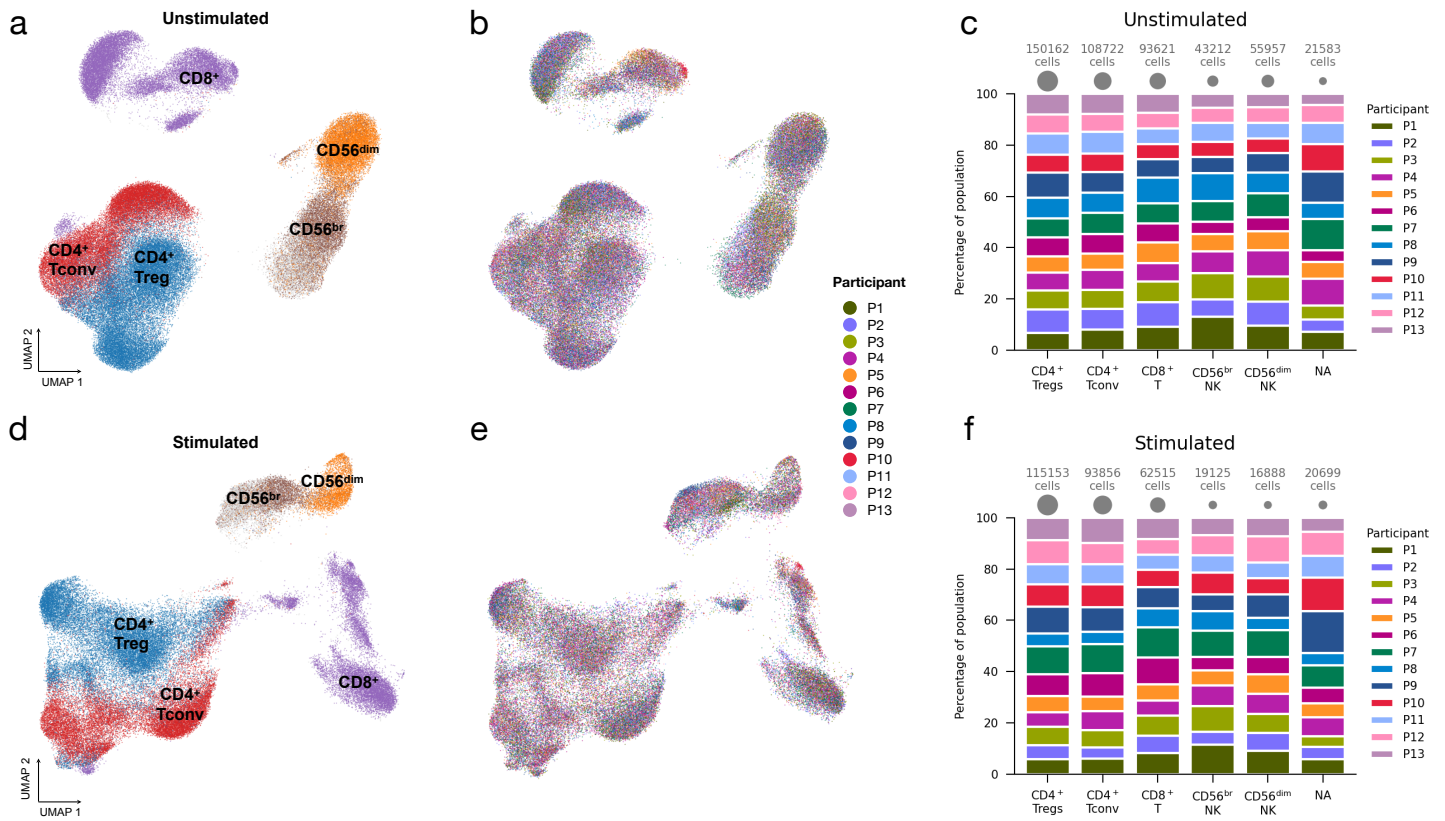

Supplementary Figure 2. Integration of the single-cell multiomics data.

**a-b**, Uniform Manifold Approximation and Projection (UMAP) plot depicting the clustering of the 460,941 unstimulated cells profiled in this study. Cells were coloured according to the corresponding oligo-conjugated barcode indicative of the respective FACS sorting gate (**a**), or according to the participant of origin (**b**). **c**, Relative proportion of cells from each individual participant in each of the flow-sorted unstimulated immune cell populations. Areas of grey circles represent total cell numbers in each immune cell population. **d-e**, UMAP plots depicting the clustering of the 323,839 cells profiled in this study following a short (90 min) in vitro stimulation with PMA + ionomycin. Cells were coloured according to the corresponding oligo-conjugated barcode indicative of the respective FACS sorting gate (**d**), or to the donor information (**e**). In **a** and **d**, gray dots correspond to untagged CD56<sup>br</sup> NK cells, whose sample barcode information are missing due to suboptimal sample tagging efficiency (see Methods). **f**, Relative proportion of cells from each individual participant in each of the flow-sorted stimulated immune cell populations. Areas of grey circles represent total cell numbers in each immune cell population. Source data for **c**, **f** are provided as a Source Data file.

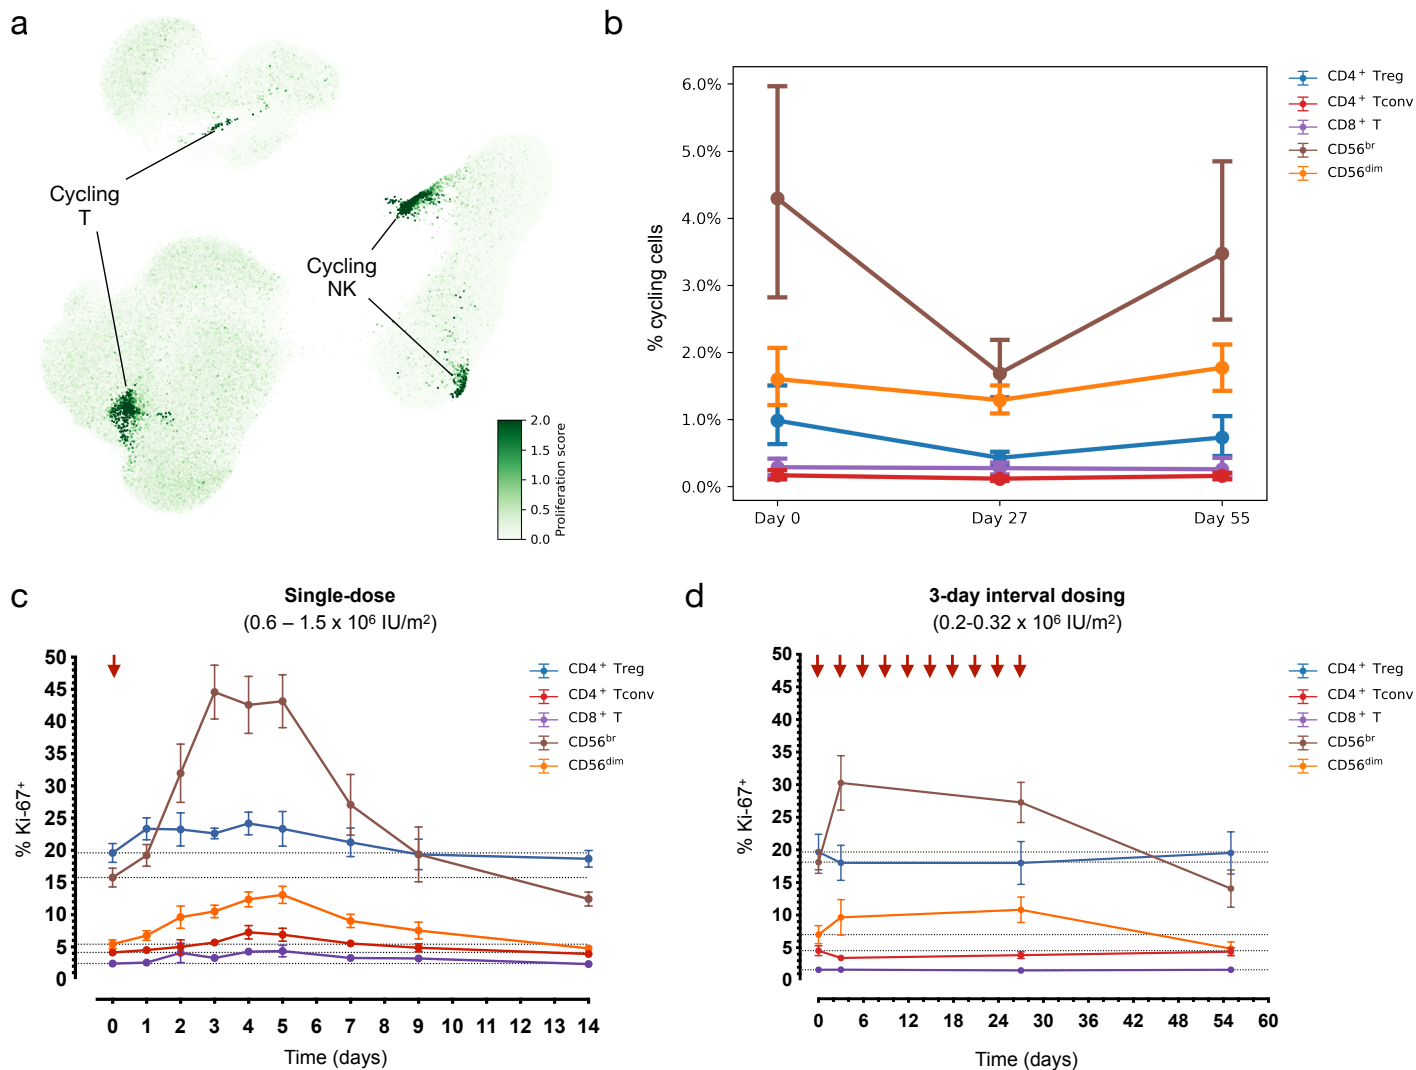

Supplementary Figure 3. Identification of proliferating cells.

**a**, UMAP plot depicting the expression of the cell-cycle signature score in each unstimulated cell. The cell-cycle signature score was calculated by summarising the expression levels of 11 pre-selected genes related to cell cycle. **b**, Frequency of proliferating cells in each immune subset identified by single-cell multiomics analysis. Proliferating cells were defined as the proportion of cells in the identified cycling clusters from each of the five sorted immune populations at Days 0, 27 and 55. Data are presented as mean values +/- 95% confidence interval. n = 13 participants. **c-d**, Frequency of Ki-67<sup>+</sup> cells within each of the five assessed immune populations in T1D patients treated with a single (DILT1D; **c**) or with the 3-day interval dosing schedule (DILfrequency; **d**). Ki-67 protein levels were assessed by intracellular flow cytometry in six patients from the DILT1D (treated with doses ranging from 0.6-1.5 x 10<sup>6</sup> IU/m<sup>2</sup> and profiled at 10 timepoints - Day 0, 1, 2, 3, 4, 5, 7, 9, 14 and 28) and five patients from the DILfrequency (treated with interval doses ranging from 0.2-0.32 x 10<sup>6</sup> IU/m<sup>2</sup> and profiled at four timepoints - Day 0, 3, 27 and 55). IL-2 dosing time points are depicted in dark red arrows. Data are presented as mean values +/- SEM. n = 13 participants. Source data for **b**, **c**, **d** are provided as a Source Data file.

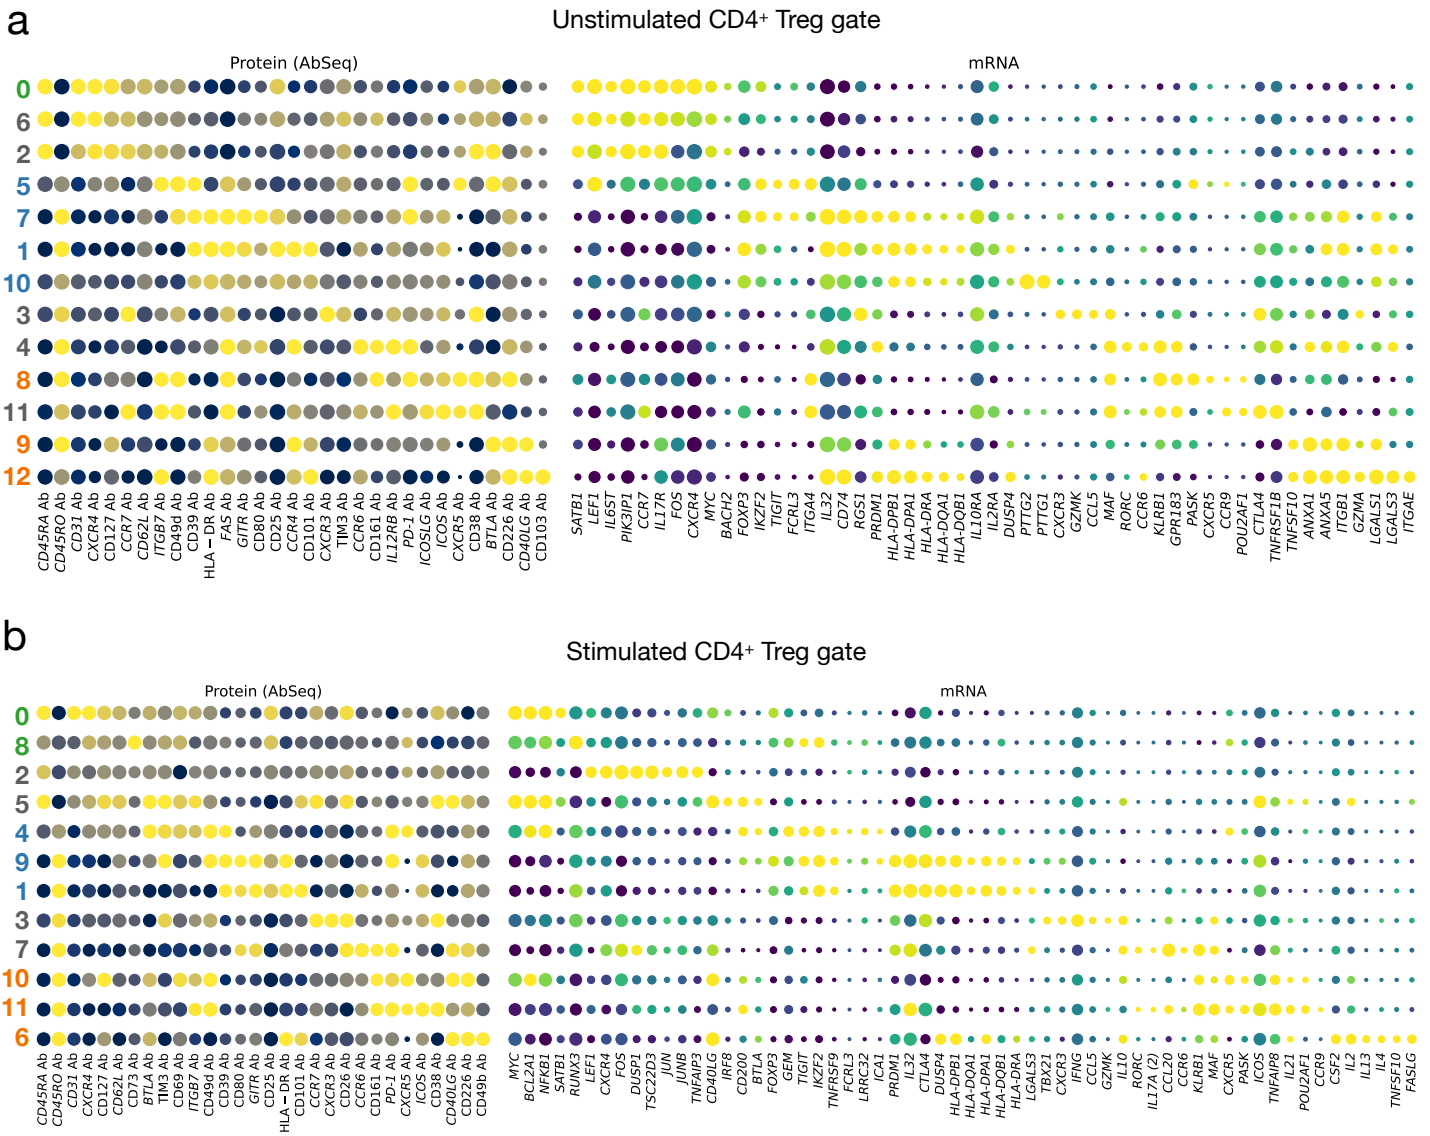

Supplementary Figure 4. Functional annotation of the CD4<sup>+</sup> CD127<sup>low</sup>CD25<sup>hi</sup> T cell subsets.

**a-b**, Expression levels of selected differentially expressed markers delineating the functional subsets in the unstimulated **(a)** and in vitro stimulated **(b)** CD4<sup>+</sup> T cells sorted from the CD127<sup>low</sup>CD25<sup>hi</sup> Treg gate. The size of the dots represents the frequency of the marker in the respective cluster and the colour brightness represents the relative expression level. Protein markers (AbSeq) are shown on the left section of the plots and mRNA markers on the right section. Clusters corresponding to: (i) naïve Tregs (defined as CD45RA<sup>+</sup> FOXP3<sup>+</sup>HELIOS<sup>+</sup>); (ii) memory Tregs (defined as CD45RA<sup>-</sup> FOXP3<sup>+</sup>HELIOS<sup>+</sup>); or (iii) CD25<sup>+</sup> FOXP3<sup>-</sup>HELIOS<sup>-</sup> Tregs (defined as CD45RA<sup>-</sup> FOXP3<sup>-</sup>HELIOS<sup>-</sup>) are annotated in green, blue and orange, respectively. All other miscellaneous clusters not conforming to this definition are annotated in black.

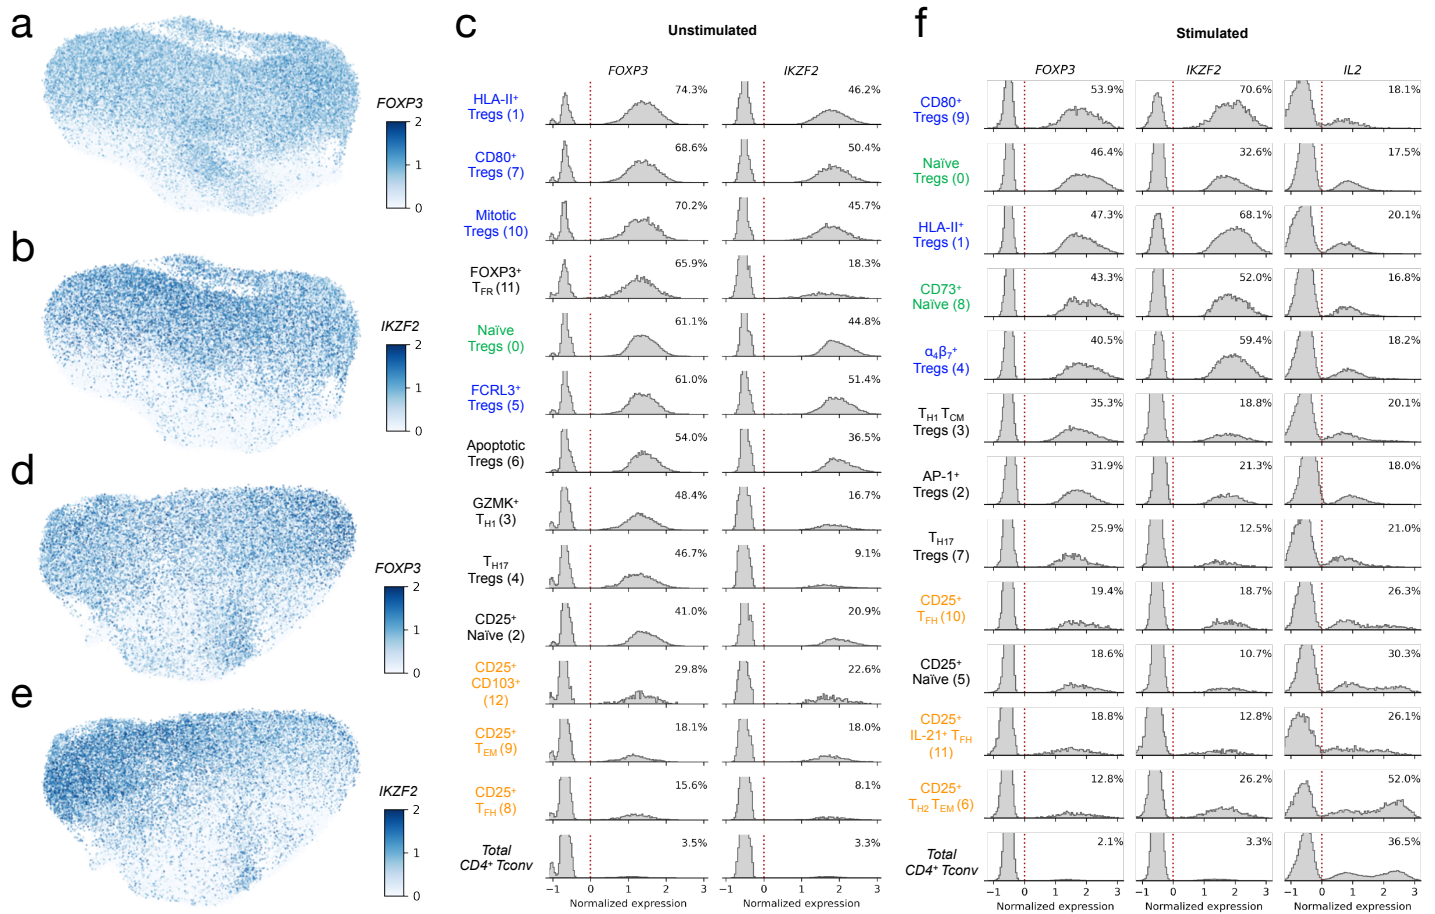

Supplementary Figure 5. Expression of *FOXP3*, *IKZF2* (HELIOS) and *IL2* differentiate functional CD4<sup>+</sup> Treg and CD4<sup>+</sup> Tconv subsets.

**a-b**, UMAP plots depicting the expression of the canonical Treg transcription factors *FOXP3* (**a**) and *IKZF2* (encoding HELIOS; **b**) in the unstimulated cells sorted from the CD4<sup>+</sup> CD127<sup>low</sup>CD25<sup>hi</sup> Treg gate. **c**, Distribution of expression levels of *FOXP3* and *IKZF2* in the identified unstimulated CD127<sup>low</sup>CD25<sup>hi</sup> CD4<sup>+</sup> T cell clusters. **d-e**, UMAP plots depicting the expression of the canonical Treg transcription factors *FOXP3* (**d**) and *IKZF2* (**e**) in the in vitro stimulated cells. **f**, Histograms depicting the expression of *FOXP3*, *IKZF2* and *IL2* in the identified in vitro stimulated clusters. Clusters corresponding to: (i) naïve Tregs (defined as CD45RA<sup>+</sup> FOXP3<sup>+</sup>HELIOS<sup>+</sup>); (ii) memory Tregs (defined as CD45RA<sup>-</sup> FOXP3<sup>+</sup>HELIOS<sup>+</sup>); or (iii) CD25<sup>+</sup> FOXP3<sup>-</sup>HELIOS<sup>-</sup> Tregs (defined as CD45RA<sup>-</sup> FOXP3<sup>-</sup>HELIOS<sup>-</sup>) are annotated in green, blue and orange, respectively. All other miscellaneous clusters not conforming to this definition are annotated in black.

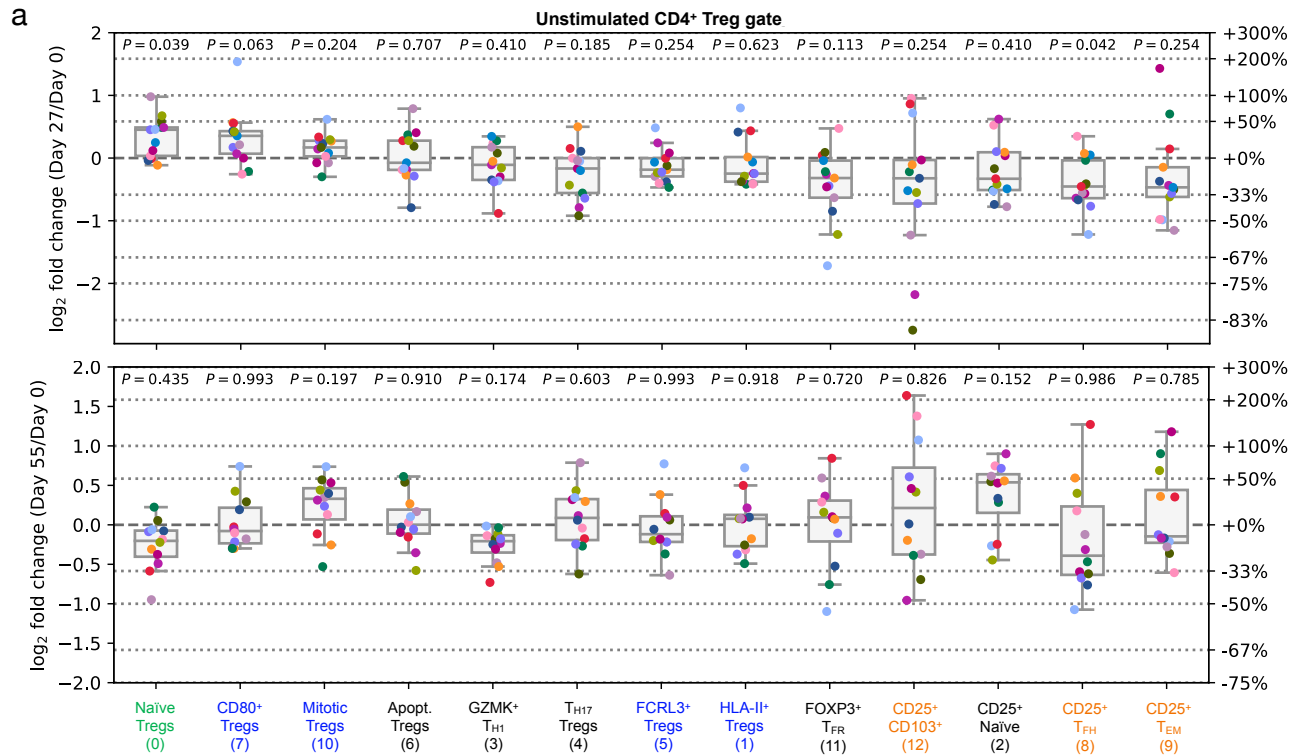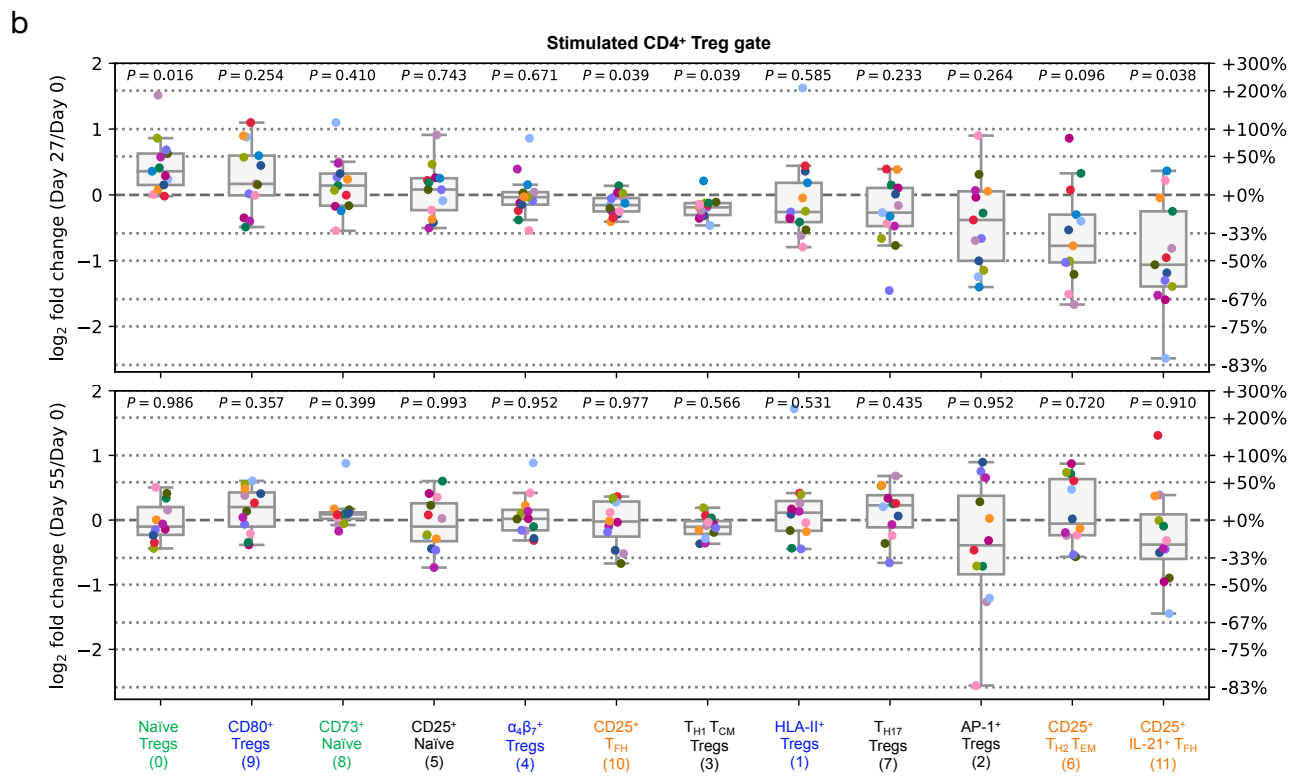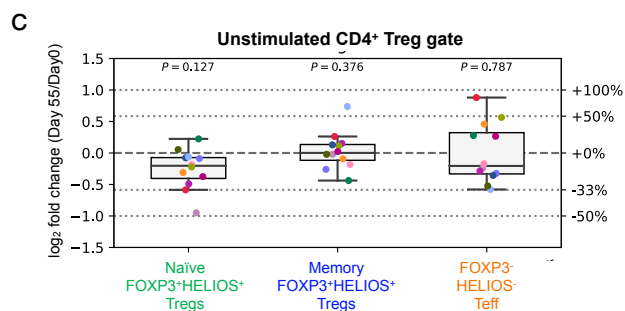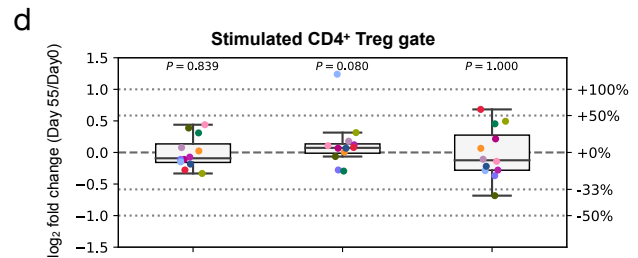

**Supplementary Figure 6. Differential abundance analysis reveals a transient increased frequency of FOXP3<sup>+</sup>HELIOS<sup>+</sup> Tregs following Id-IL2 treatment.**

**a-b**, Relative frequency changes of all the identified unstimulated (**a**) or in vitro stimulated (**b**) CD127<sup>low</sup>CD25<sup>hi</sup> T cell clusters between Day 0 and Day 27 (top panels) or Day 55 (bottom panels). Clusters corresponding to: (i) naïve Tregs (defined as CD45RA<sup>+</sup> FOXP3<sup>+</sup>HELIOS<sup>+</sup>), (ii) memory Tregs (defined as CD45RA<sup>-</sup> FOXP3<sup>+</sup>HELIOS<sup>+</sup>), and (iii) CD25<sup>+</sup> FOXP3<sup>-</sup> HELIOS<sup>-</sup> Teffs (defined as CD45RA<sup>-</sup> FOXP3<sup>-</sup>HELIOS<sup>-</sup>) are annotated in green, blue and orange, respectively. All other miscellaneous clusters not conforming to this definition are annotated in black. Asterisks denote statistically significant differences (two-sided Wilcoxon signed-rank test) in cell population frequencies between the two time points. **c-d**, Relative frequency changes of unstimulated (**c**) or in vitro stimulated (**d**) naïve FOXP3<sup>+</sup>HELIOS<sup>+</sup> Treg, memory FOXP3<sup>+</sup>HELIOS<sup>+</sup> Treg, and CD25<sup>+</sup> FOXP3<sup>-</sup>HELIOS<sup>-</sup>Teff clusters in blood between Day 0 and Day 55. In **a-d**, each dot represents cells from a single participant, with colour defined as in Supplementary Figure 2b. n = 13 participants. Each box ranges from the first quartile (Q1) to the third quartile (Q3), with a central line indicating the median. The bottom and top whiskers extend to the most extreme data points within  $Q1 - 1.5 \times (Q3 - Q1)$  and  $Q3 + 1.5 \times (Q3 - Q1)$ , respectively. *P* values were calculated using two-sided Wilcoxon signed-rank tests based on cell population frequencies between the two assessed time points, followed by Benjamini–Hochberg FDR adjustment. Source data for **a-d** are provided as a Source Data file.



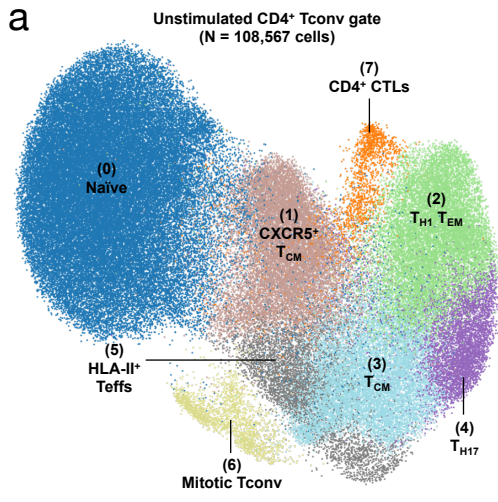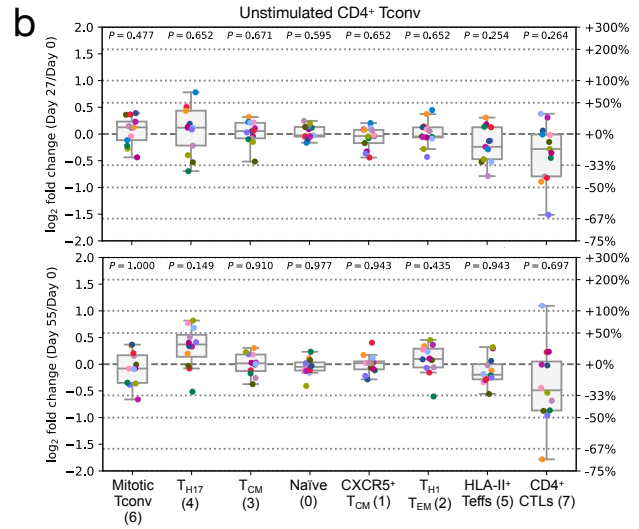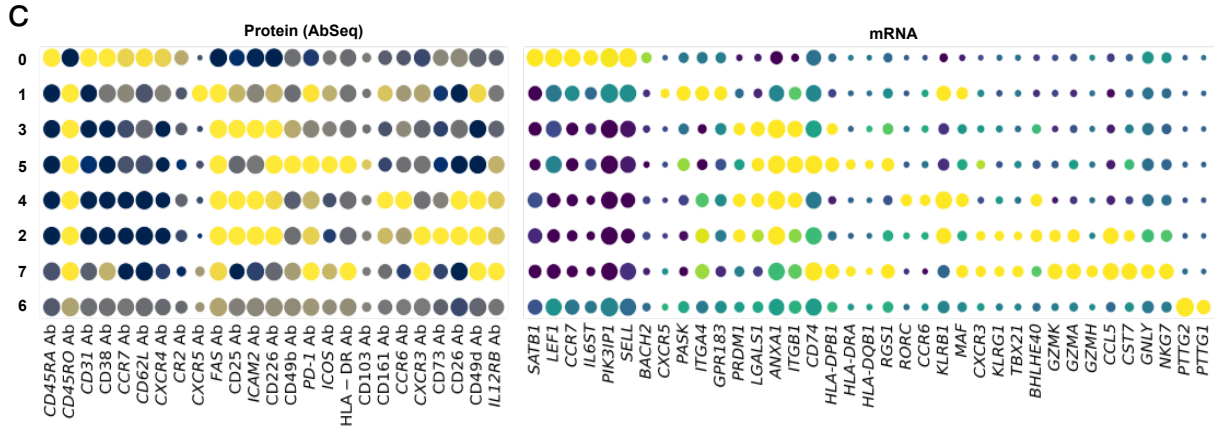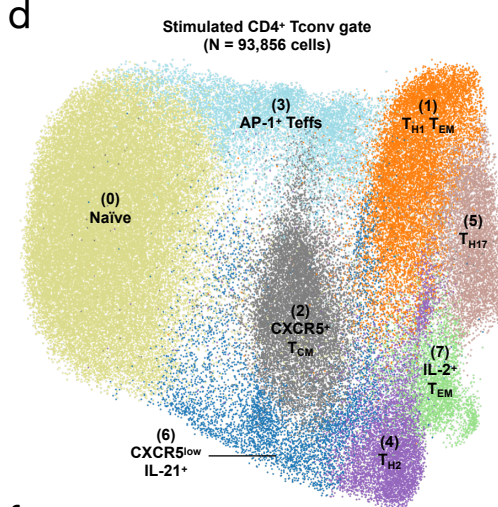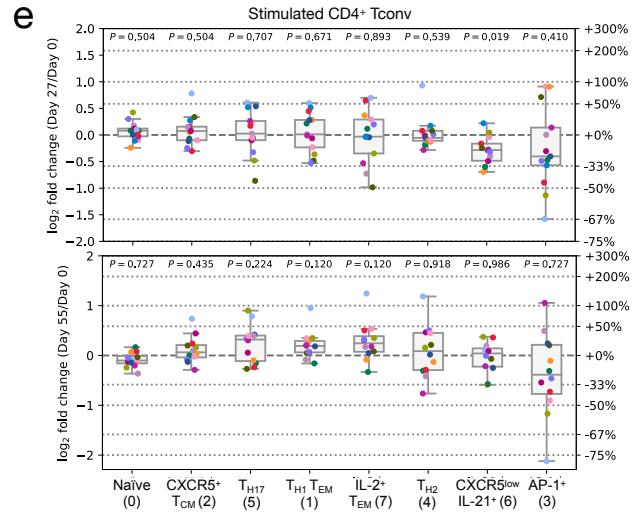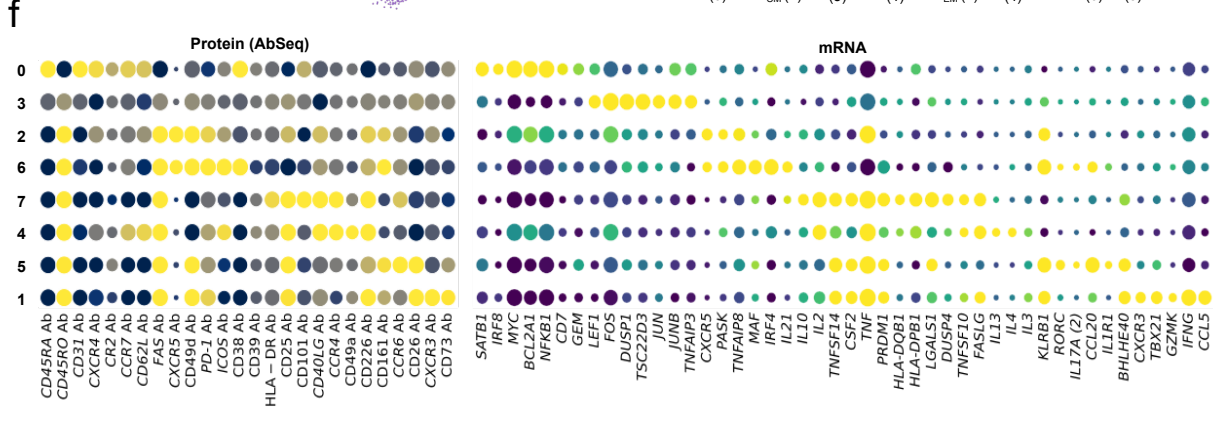

**Supplementary Figure 7. Analysis of circulating CD4<sup>+</sup> CD25<sup>-/low</sup> conventional T cells.**

**a**, UMAP plot depicting the clustering of the 108,722 unstimulated CD4<sup>+</sup> T cells sorted from the CD25<sup>-/low</sup> Tconv gate profiled in this study. Clusters were manually annotated based on the expression of key differentially expressed mRNA and protein markers. **b**, Expression levels of selected differentially expressed markers delineating the functional subsets in the unstimulated CD4<sup>+</sup> T cells sorted from the CD25<sup>-/low</sup> Tconv gate. The size of the dots represents the frequency of the marker in the respective cluster and the colour brightness represents the relative expression level. Protein markers (AbSeq) are shown on the left section of the plots and mRNA markers on the right section. **c**, Relative frequency changes of all identified unstimulated CD4<sup>+</sup> CD25<sup>-/low</sup> Tconv clusters in blood at Day 27 (top panel) or Day 55 (bottom panel) compared to the baseline pre-treatment (Day 0) levels. **d-f**, Plots corresponding to **a-c**, for the 93,856 in vitro stimulated CD4<sup>+</sup> T cells sorted from the CD25<sup>-/low</sup> Tconv gate. In **b** and **e**, each box ranges from the first quartile (Q1) to the third quartile (Q3), with a central line indicating the median. The bottom and top whiskers extend to the most extreme data points within  $Q1 - 1.5 \times (Q3 - Q1)$  and  $Q3 + 1.5 \times (Q3 - Q1)$ , respectively. Each participant is represented by a different colour, as defined in Supplementary Figure 2b.  $n = 13$  participants.  $P$  values were calculated using two-sided Wilcoxon signed-rank tests based on cell population frequencies between the two assessed time points, followed by Benjamini-Hochberg FDR adjustment. Source data for **b**, **e** are provided as a Source Data file.

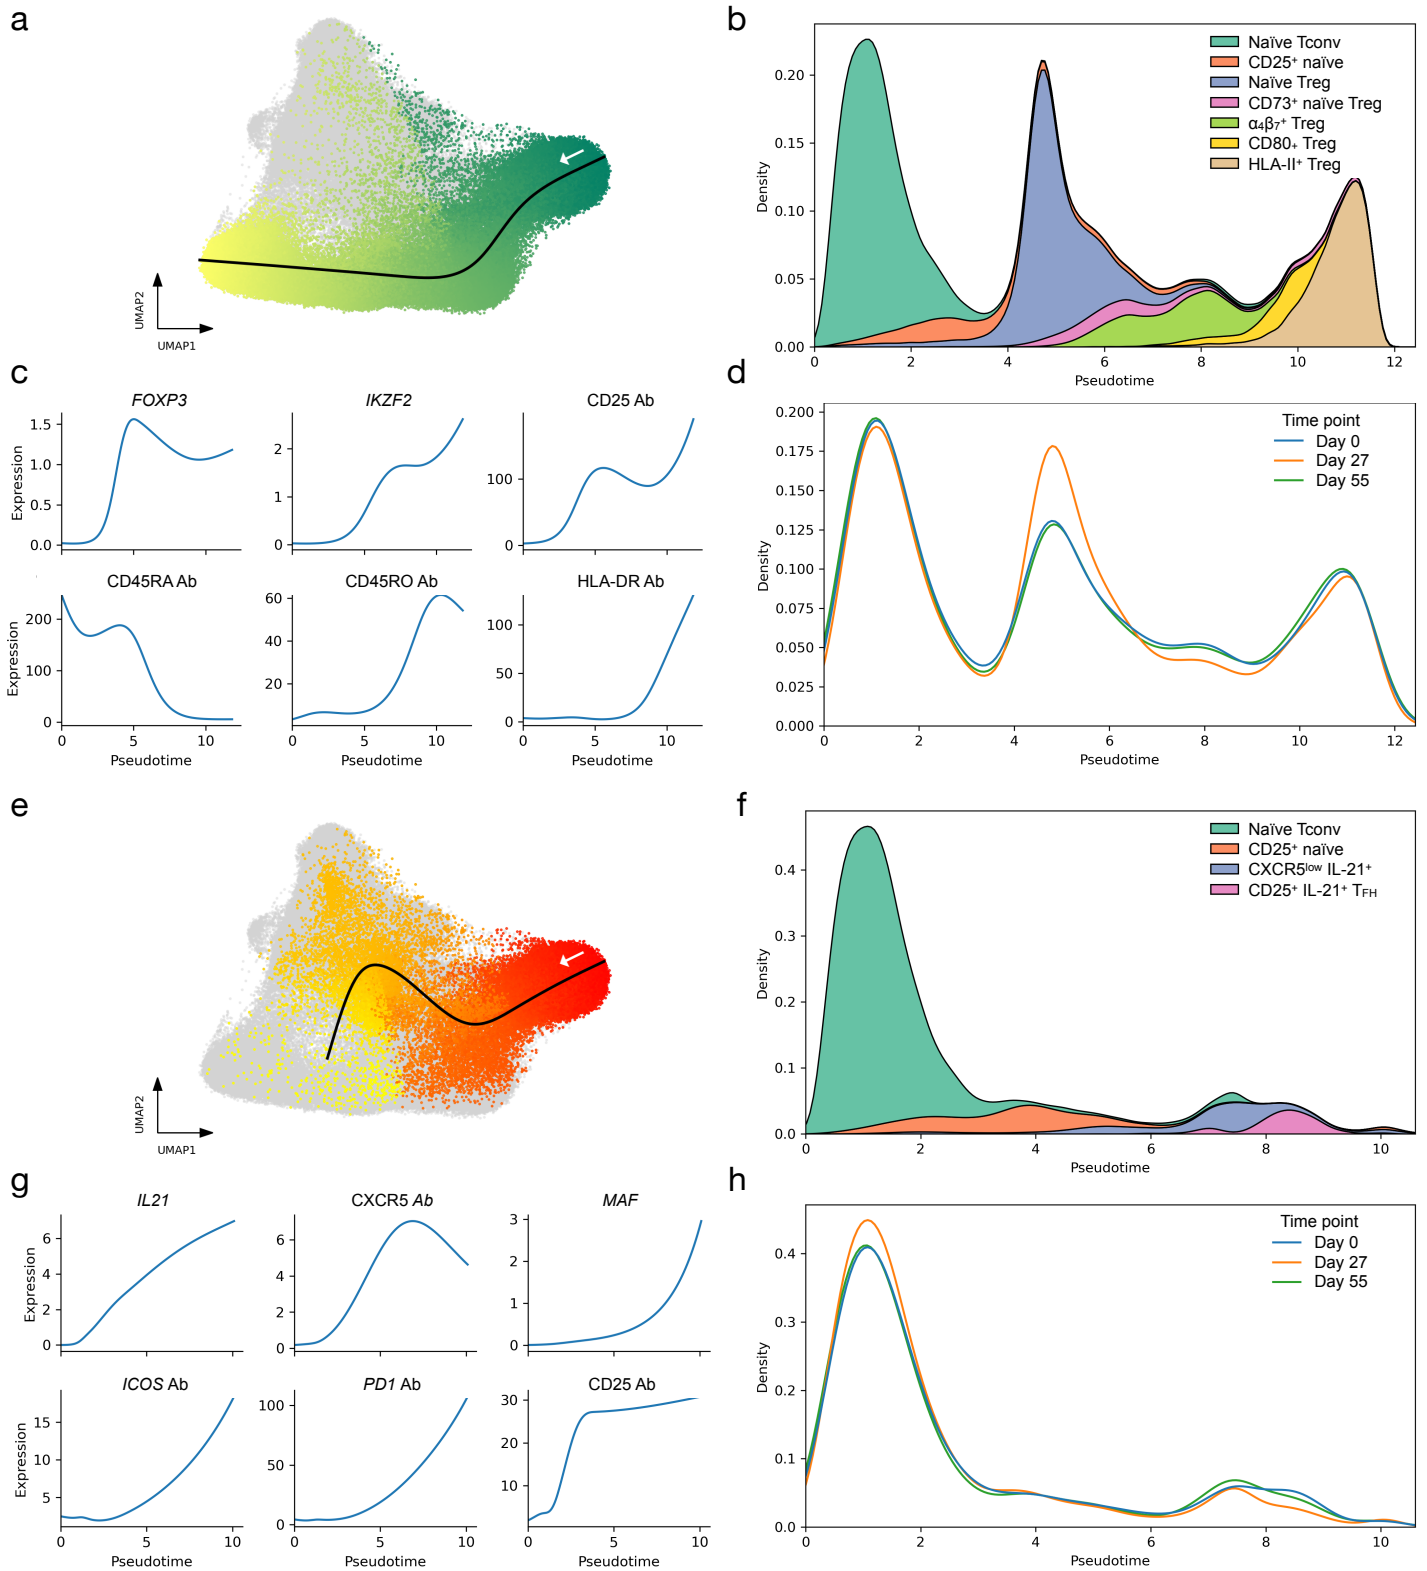

Supplementary Figure 8. Pseudo-time analysis reveals trajectories of Treg and T<sub>FH</sub> differentiation in in vitro stimulated CD4<sup>+</sup> T cells.

**a**, UMAP plot depicting the Treg differentiation trajectory identified by Slingshot pseudo-time analysis. **b**, Pseudo-time distribution of cells associated with the Treg trajectory, stratified by cluster labels. **c**, Fitted expression curves of selected

canonical Treg genes by pseudo-time. **d**, Pseudo-time distribution of cells associated with the Treg trajectory, stratified by time points. **e**, UMAP plot depicting the  $T_{FH}$  differentiation trajectory identified by Slingshot pseudo-time analysis. **f**, Pseudo-time distribution of cells associated with the  $T_{FH}$  trajectory, stratified by cluster labels. **g**, Fitted expression curves of selected canonical  $T_{FH}$  genes by pseudo-time. **h**, Pseudo-time distribution of cells associated with the  $T_{FH}$  trajectory, stratified by time points. Data from **a-h** were generated from in vitro stimulated  $CD4^+$  T cells.

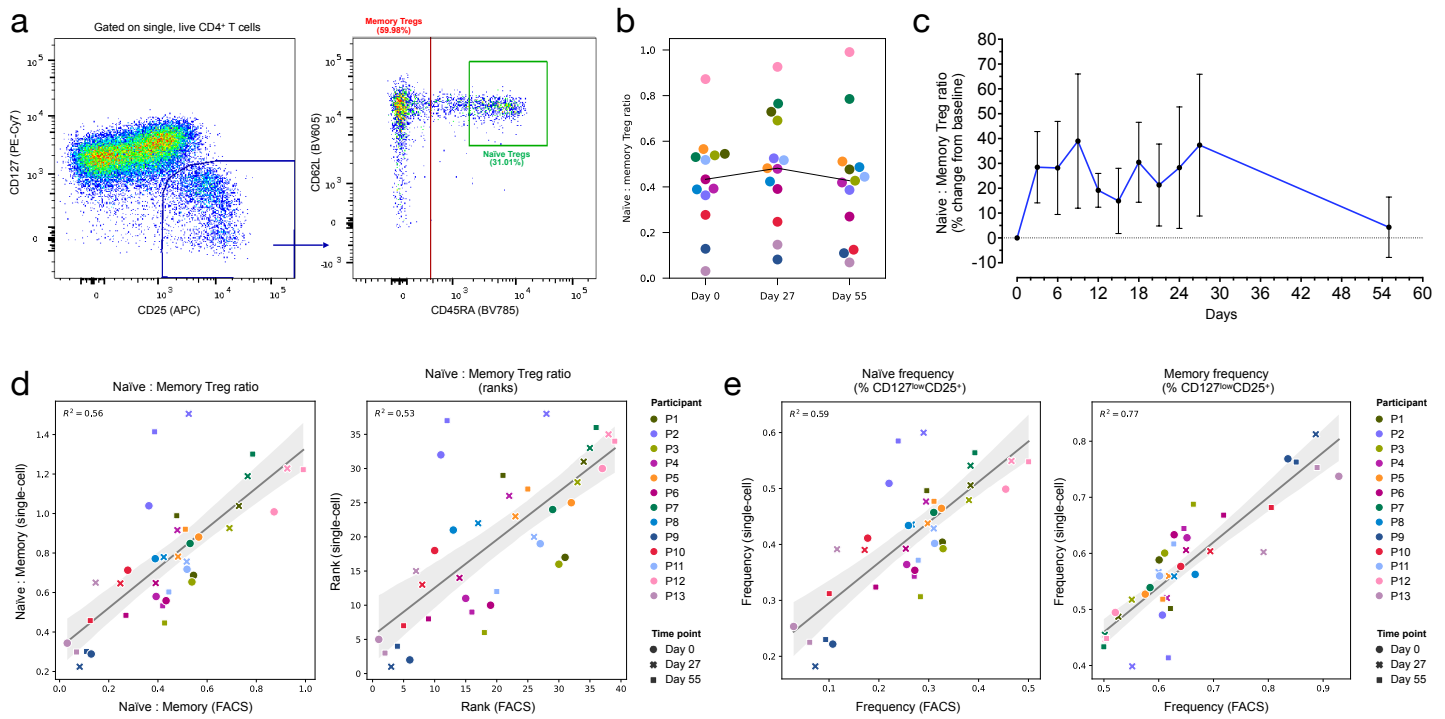

Supplementary Figure 9. Replication of the ratio of naïve:memory Tregs by FACS.

**a**, Gating strategy for the delineation of the naïve (CD45RA<sup>+</sup>) and memory (CD45RA<sup>-</sup>) compartment by flow cytometry within cells sorted from the CD4<sup>+</sup> CD127<sup>low</sup>CD25<sup>hi</sup> Treg gate. **b**, Ratio between naïve and memory cells within the CD4<sup>+</sup> CD127<sup>low</sup>CD25<sup>hi</sup> Treg gate at the three assessed timepoints (Day 0, Day 27 and Day 55). Each dot represents cells from a single participant. The connecting line represents the median naïve:memory ratio in the 13 participants selected for single-cell analysis at each time point. **c**, Variation (depicted as the % change from baseline pre-treatment levels) in the naïve:memory ratio within the CD4<sup>+</sup> CD127<sup>low</sup>CD25<sup>hi</sup> Treg gate assessed by flow cytometry. Data are presented as mean values +/- SEM at each visit for n = 13 participants selected for single-cell analysis. **d**, Correlation between the naïve:memory ratio within CD4<sup>+</sup> CD127<sup>low</sup>CD25<sup>hi</sup> T cells (left panel), or the corresponding ranks (right panel), obtained from FACS data (x axis) and that estimated from single-cell sequencing data (y axis). **e**, Correlation between the frequency of naïve (CD45RA<sup>+</sup>; left panel) and memory (CD45RA<sup>-</sup>; right panel) cells within CD127<sup>low</sup>CD25<sup>hi</sup> T cells obtained from FACS data (x axis) and that obtained from single-cell sequencing data (y axis). In **b**, **d** and **e**, each dot represents a sample, with colours and shapes representing participants and time points of origin, respectively. In **d-e**, linear regression models are presented as least square estimates (black lines) +/- 95% confidence intervals (grey shades). n = 13 participants. Source data for **b-e** are provided as a Source Data file.

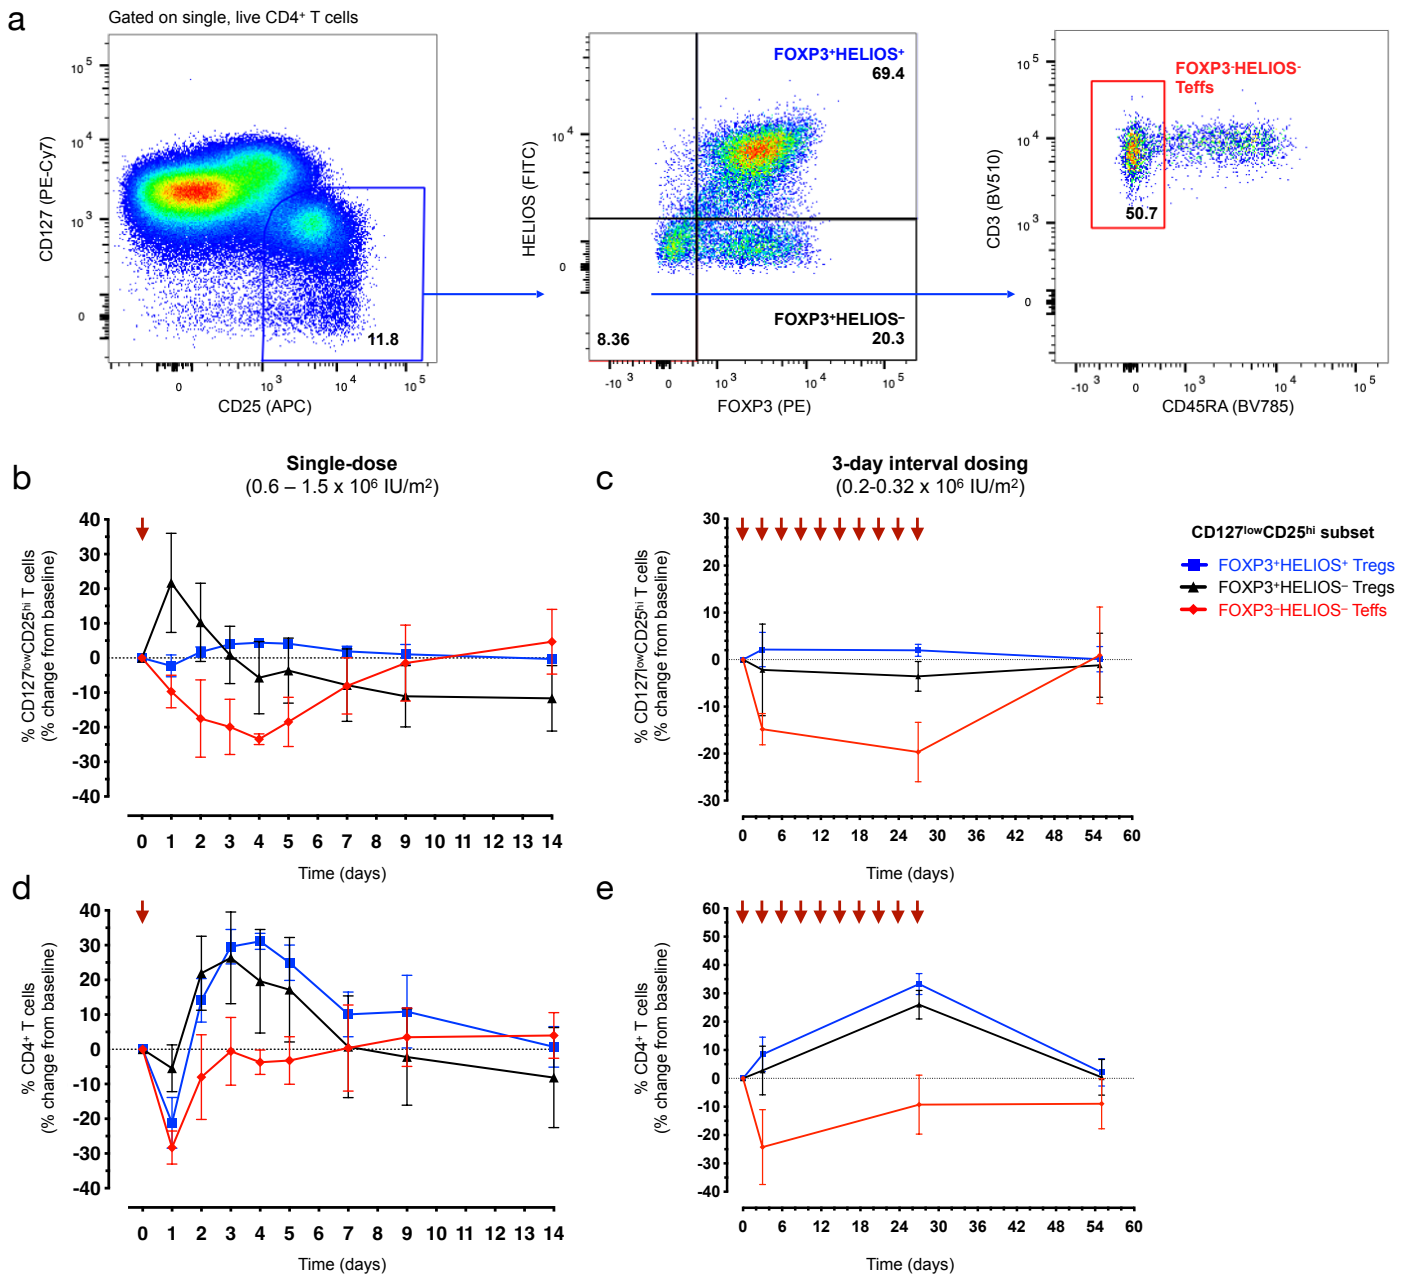

Supplementary Figure 10. Delineation of Treg subsets by FACS.

**a**, Gating strategy for the delineation of the FOXP3<sup>+</sup>HELIOS<sup>+</sup> Treg, FOXP3<sup>+</sup>HELIOS<sup>-</sup> Treg and CD45RA<sup>-</sup> FOXP3<sup>-</sup>HELIOS<sup>-</sup> Teff subsets by flow cytometry. **b-c** Variation (depicted as the % change from baseline pre-treatment levels) in the frequency of FOXP3<sup>+</sup>HELIOS<sup>+</sup> (blue), FOXP3<sup>+</sup>HELIOS<sup>-</sup> (black) and CD45RA<sup>-</sup> FOXP3<sup>-</sup>HELIOS<sup>-</sup> (red) cells within the CD127<sup>low</sup>CD25<sup>hi</sup> gate in patients treated with a single dose (DILT1D; **b**) or with the 3-day interval dosing schedule (DILfrequency; **c**). Baseline levels (mean values +/- SEM): (i) DILT1D: FOXP3<sup>+</sup>HELIOS<sup>+</sup> = 71.5% +/- 1.47, FOXP3<sup>+</sup>HELIOS<sup>-</sup> = 15.6% +/- 1.63 and CD45RA<sup>-</sup> FOXP3<sup>-</sup>HELIOS<sup>-</sup> = 4.7% +/- 0.44; (ii) DILfrequency: FOXP3<sup>+</sup>HELIOS<sup>+</sup> = 66.9% +/- 2.0, FOXP3<sup>+</sup>HELIOS<sup>-</sup> = 19.8% +/- 1.60 and CD45RA<sup>-</sup> FOXP3<sup>-</sup>HELIOS<sup>-</sup> = 8.0% +/- 1.02. **d-e**, Variation (depicted as the % change from baseline pre-treatment levels) in the frequency of the FOXP3<sup>+</sup>HELIOS<sup>+</sup> Treg, FOXP3<sup>+</sup>HELIOS<sup>-</sup> Treg and CD45RA<sup>-</sup> FOXP3<sup>-</sup>HELIOS<sup>-</sup> Teff subsets in patients treated with a single dose (**d**) or with the 3-day interval (**e**) dosing schedule. Baseline levels (mean values +/- SEM): (i)

DILT1D: FOXP3<sup>+</sup>HELIOS<sup>+</sup> = 5.0% +/- 0.54, FOXP3<sup>+</sup>HELIOS<sup>-</sup> = 1.2% +/- 0.24 and CD45RA<sup>-</sup> FOXP3<sup>-</sup>HELIOS<sup>-</sup> = 0.34% +/- 0.06; (ii) DILfrequency: FOXP3<sup>+</sup>HELIOS<sup>+</sup> = 4.2% +/- 0.44, FOXP3<sup>+</sup>HELIOS<sup>-</sup> = 1.3% +/- 0.22 and CD45RA<sup>-</sup> FOXP3<sup>-</sup>HELIOS<sup>-</sup> = 0.49% +/- 0.05. In **b** and **d**, n = 6 DILT1D participants treated with doses ranging from 0.6-1.5 x 10<sup>6</sup> IU/m<sup>2</sup>. In **c** and **e**, n = 5 DILfrequency participants treated with interval doses ranging from 0.2-0.32 x 10<sup>6</sup> IU/m<sup>2</sup>. In **b-e**, data are presented as mean values +/- SEM. IL-2 dosing time points are depicted in dark red arrows. Source data for **b-e** are provided as a Source Data file.

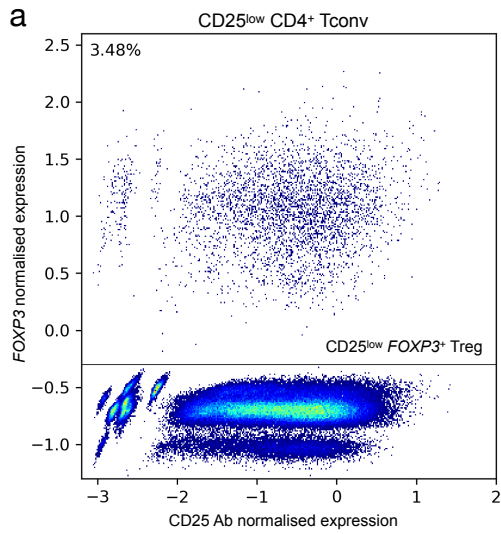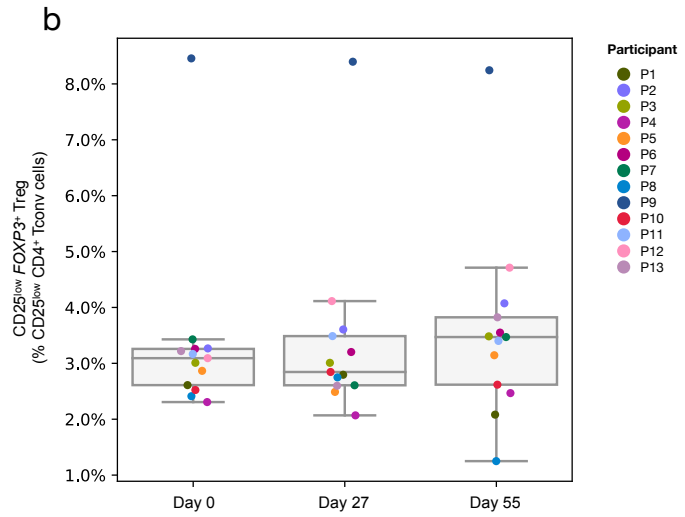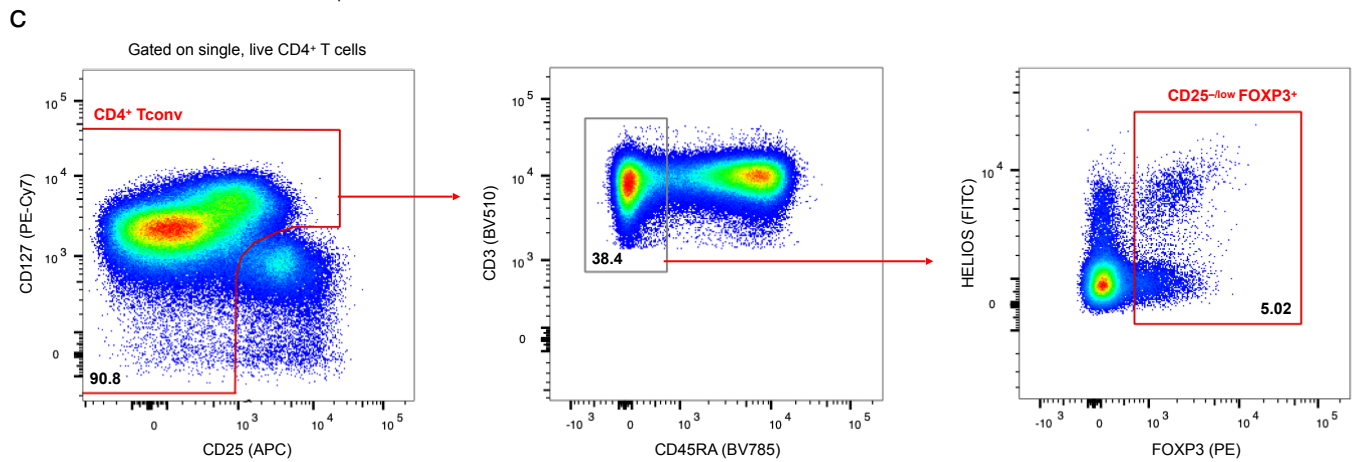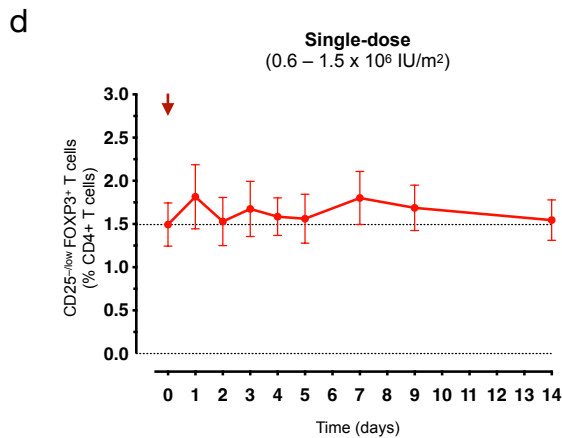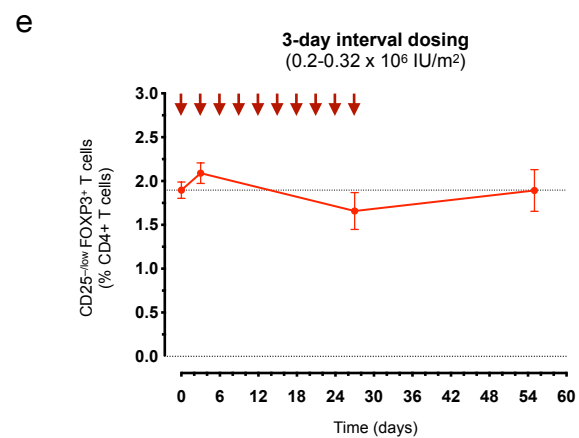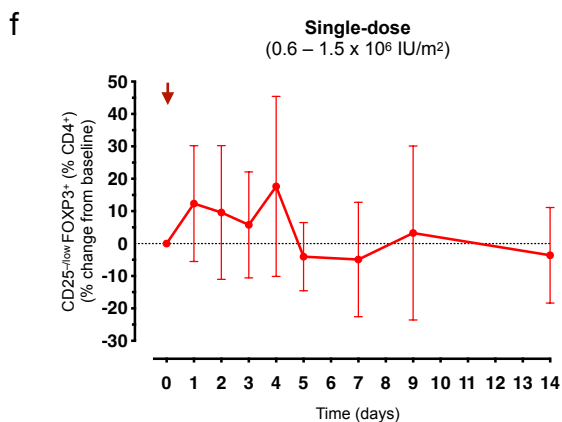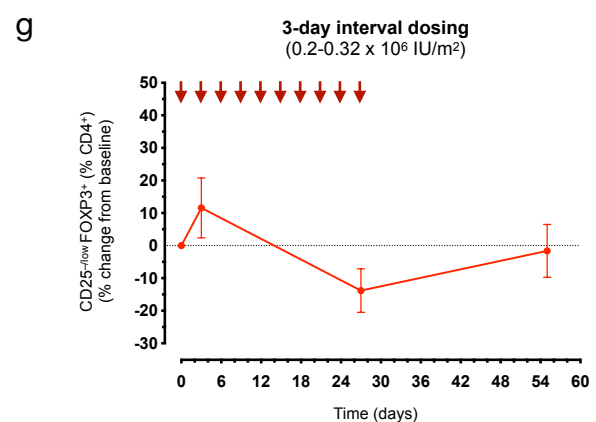



**Supplementary Figure 11. Interval low-dose IL-2 treatment does not affect the frequency of CD25<sup>-/low</sup> FOXP3<sup>+</sup> T cells.**

**a**, Identification of FOXP3<sup>+</sup> within cells sorted from the CD25<sup>-/low</sup> Tconv gate. FOXP3<sup>+</sup> cells were defined as cells with one or more counts of *FOXP3* RNA detected. Data was generated from the analysis of the 13 DILfrequency donors selected for the single-cell multiomics analysis. **b**, Box and whiskers plot depicts the frequency of FOXP3<sup>+</sup> cells within the CD25<sup>-/low</sup> Tconv gate at Days 0, 27 and 55. Each dot represents a sample, with colours and shapes representing participants and time points of origin, respectively. Each box ranges from the first quartile (Q1) to the third quartile (Q3), with a central line indicating the median. The bottom and top whiskers extend to the most extreme data points within  $Q1 - 1.5 \times (Q3 - Q1)$  and  $Q3 + 1.5 \times (Q3 - Q1)$ , respectively.  $n = 13$  participants. **c**, Gating strategy for the delineation of CD25<sup>-/low</sup> FOXP3<sup>+</sup> T cells by flow cytometry. **d-e** Frequency of CD25<sup>-/low</sup> FOXP3<sup>+</sup> T cells in patients treated with a single dose (DILT1D; **d**) or with the 3-day interval dosing schedule (DILfrequency; **e**). **f-g**, Variation (depicted as the % change from baseline pre-treatment levels) in the frequency of the CD25<sup>-/low</sup> FOXP3<sup>+</sup> T cells in patients treated with a single dose (**f**) or with the 3-day interval dosing (**g**) schedule. In **d** and **f**,  $n = 6$  DILT1D participants treated with doses ranging from  $0.6-1.5 \times 10^6$  IU/m<sup>2</sup>. In **e** and **g**,  $n = 5$  DILfrequency participants treated with interval doses ranging from  $0.2-0.32 \times 10^6$  IU/m<sup>2</sup>. In **d-g**, data are presented as mean values +/- SEM. IL-2 dosing days are depicted in red in the x axis. Source data for **b**, **d-g** are provided as a Source Data file.

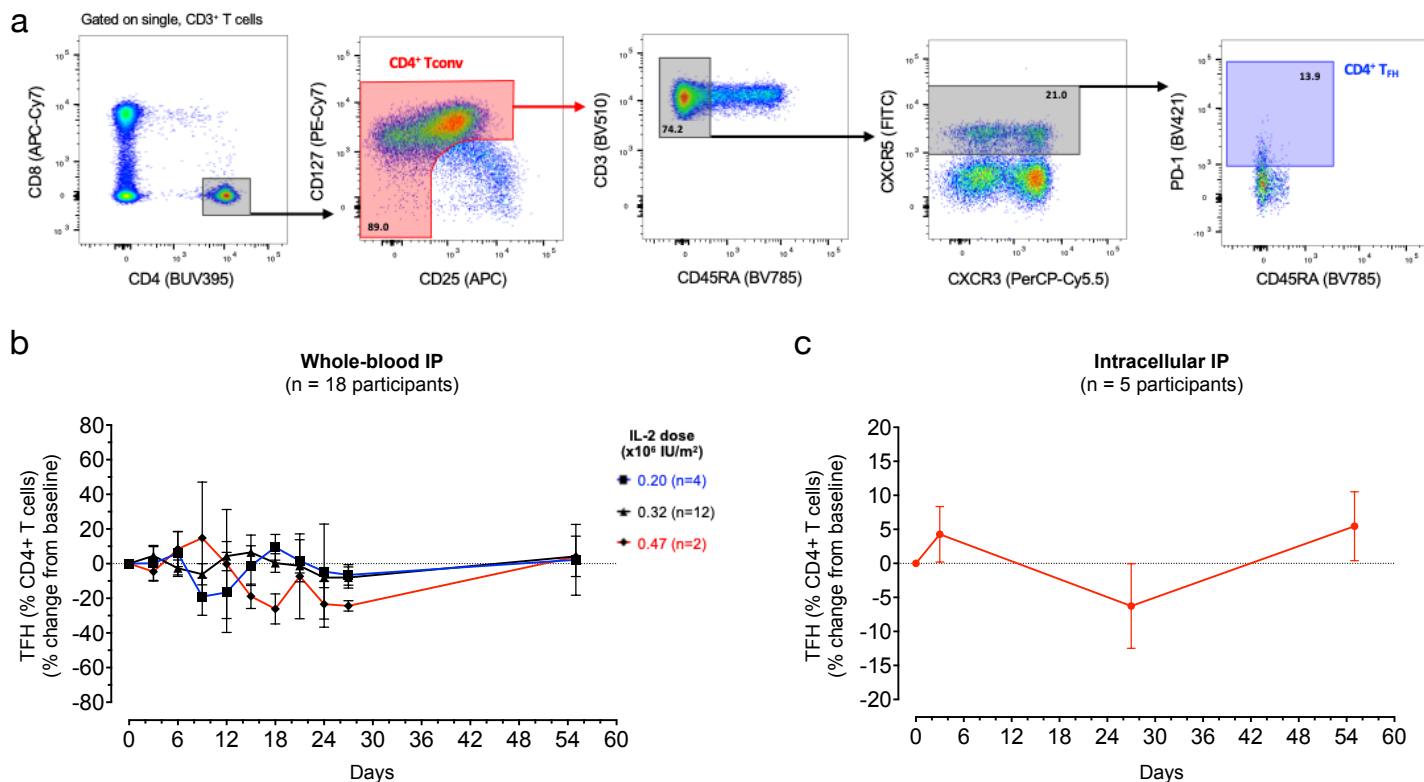

Supplementary Figure 12. Immunophenotyping the circulating CD4<sup>+</sup> T follicular helper (T<sub>FH</sub>) subset by FACS.

**a**, Gating strategy for the delineation of circulating CD4<sup>+</sup> T<sub>FH</sub> cells by FACS. **b-c**, Variation (depicted as the % change from pre-treatment baseline levels) in the relative frequency of CD4<sup>+</sup> T<sub>FH</sub> cells. Frequency of CD4<sup>+</sup> T<sub>FH</sub> cells was determined by flow cytometry in whole-blood from n = 18 DILfrequency participants treated with the 3-day interval dosing schedule (**b**) or in a subset of n = 5 DILfrequency participants selected for intracellular immunophenotyping (IP, **c**) who were treated with 200,000-320,000 IU/m<sup>2</sup> IL-2 every three days. Data are presented mean values +/- SEM.

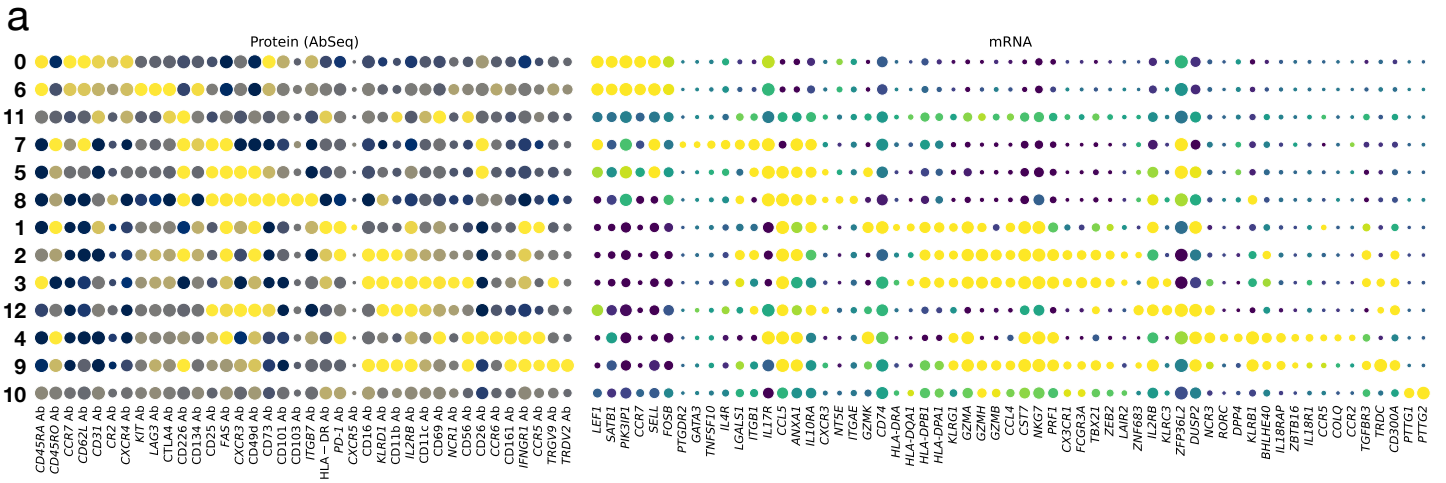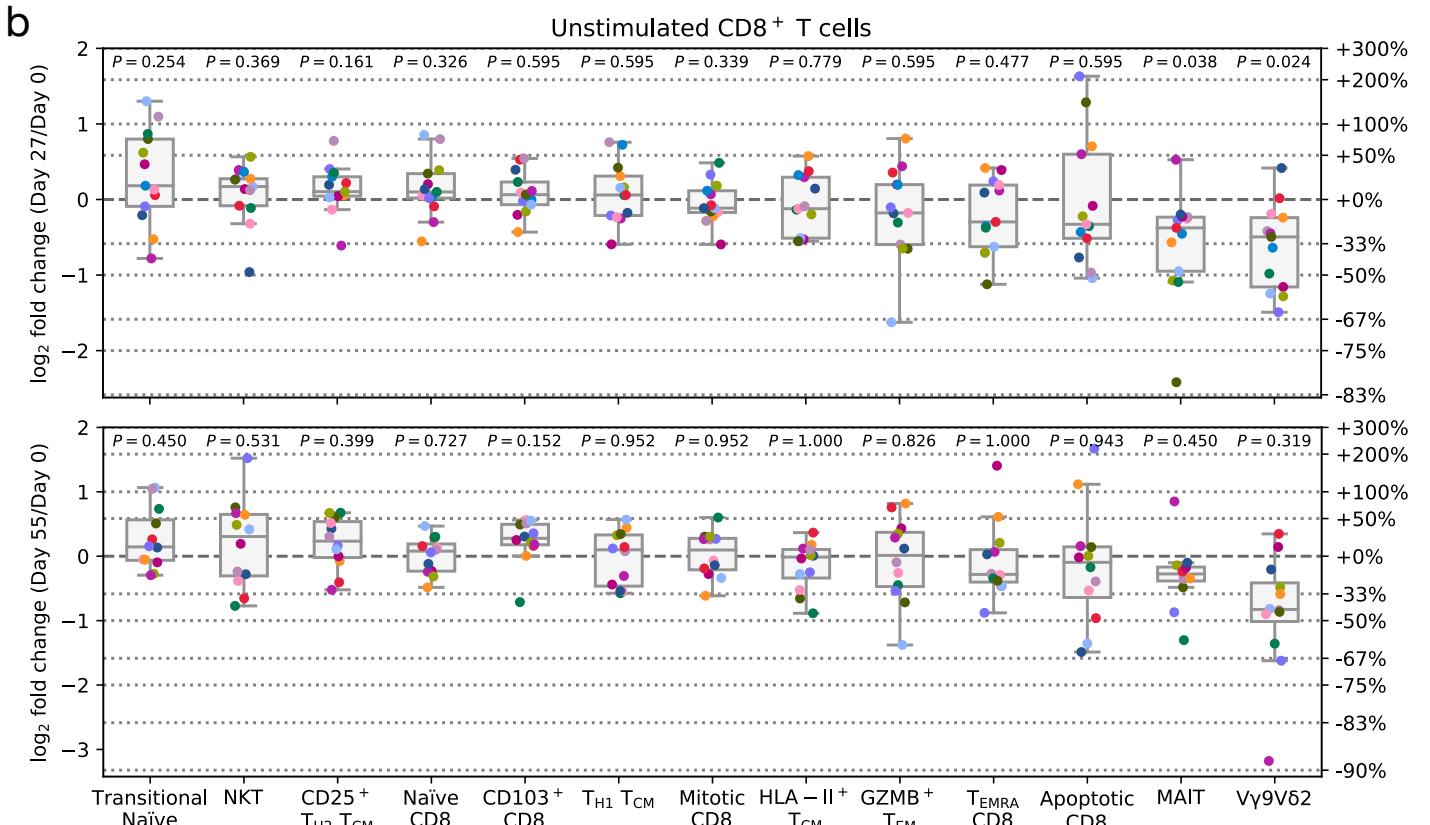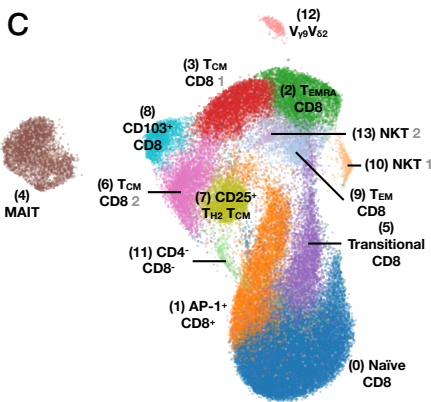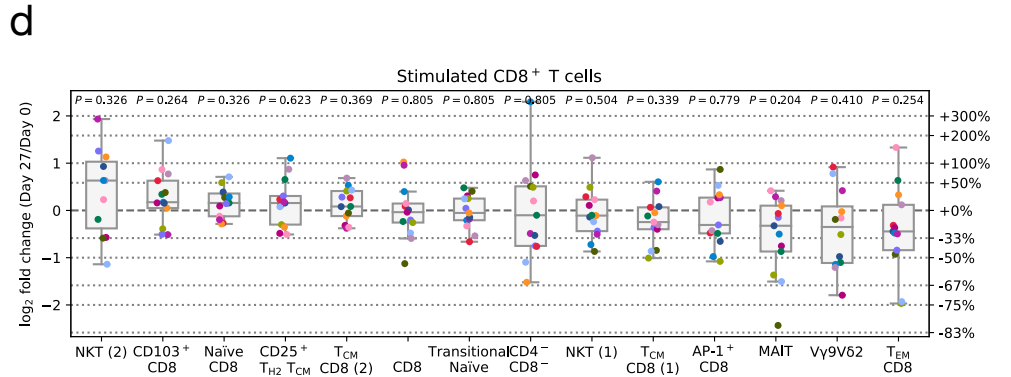

### Supplementary Figure 13. Functional annotation of CD8<sup>+</sup> T cells.

**a**, Expression of selected differentially-expressed markers delineating the functional subsets identified from the 13 clustering of the 93,621 unstimulated CD8<sup>+</sup> T cells profiled in this study. The size of the dots represents the frequency of the marker in the respective cluster and the colour brightness represents the relative expression level. Protein markers (AbSeq) are shown on the left section of the plots and mRNA markers on the right section. **b**, Relative frequency changes of all identified CD8<sup>+</sup> T cell clusters on Day 27 (top panel) or Day 55 (bottom panel) compared to the baseline pre-treatment levels. **c**, UMAP plot depicting the clustering of in vitro stimulated CD8<sup>+</sup> T cells. Clusters were manually annotated based on the expression of key differentially expressed mRNA and protein markers. **d**, Relative frequency changes of the 14 identified stimulated CD8<sup>+</sup> T cell clusters at Day 27 compared to the baseline pre-treatment (Day 0) levels. In **b** and **d**, each box ranges from the first quartile (Q1) to the third quartile (Q3), with a central line indicating the median. The bottom and top whiskers extend to the most extreme data points within  $Q1 - 1.5 \times (Q3 - Q1)$  and  $Q3 + 1.5 \times (Q3 - Q1)$ , respectively. Each participant is represented by a different colour, as defined in Supplementary Figure 2b.  $n = 13$  participants. Source data for **b**, **d** are provided as a Source Data file.

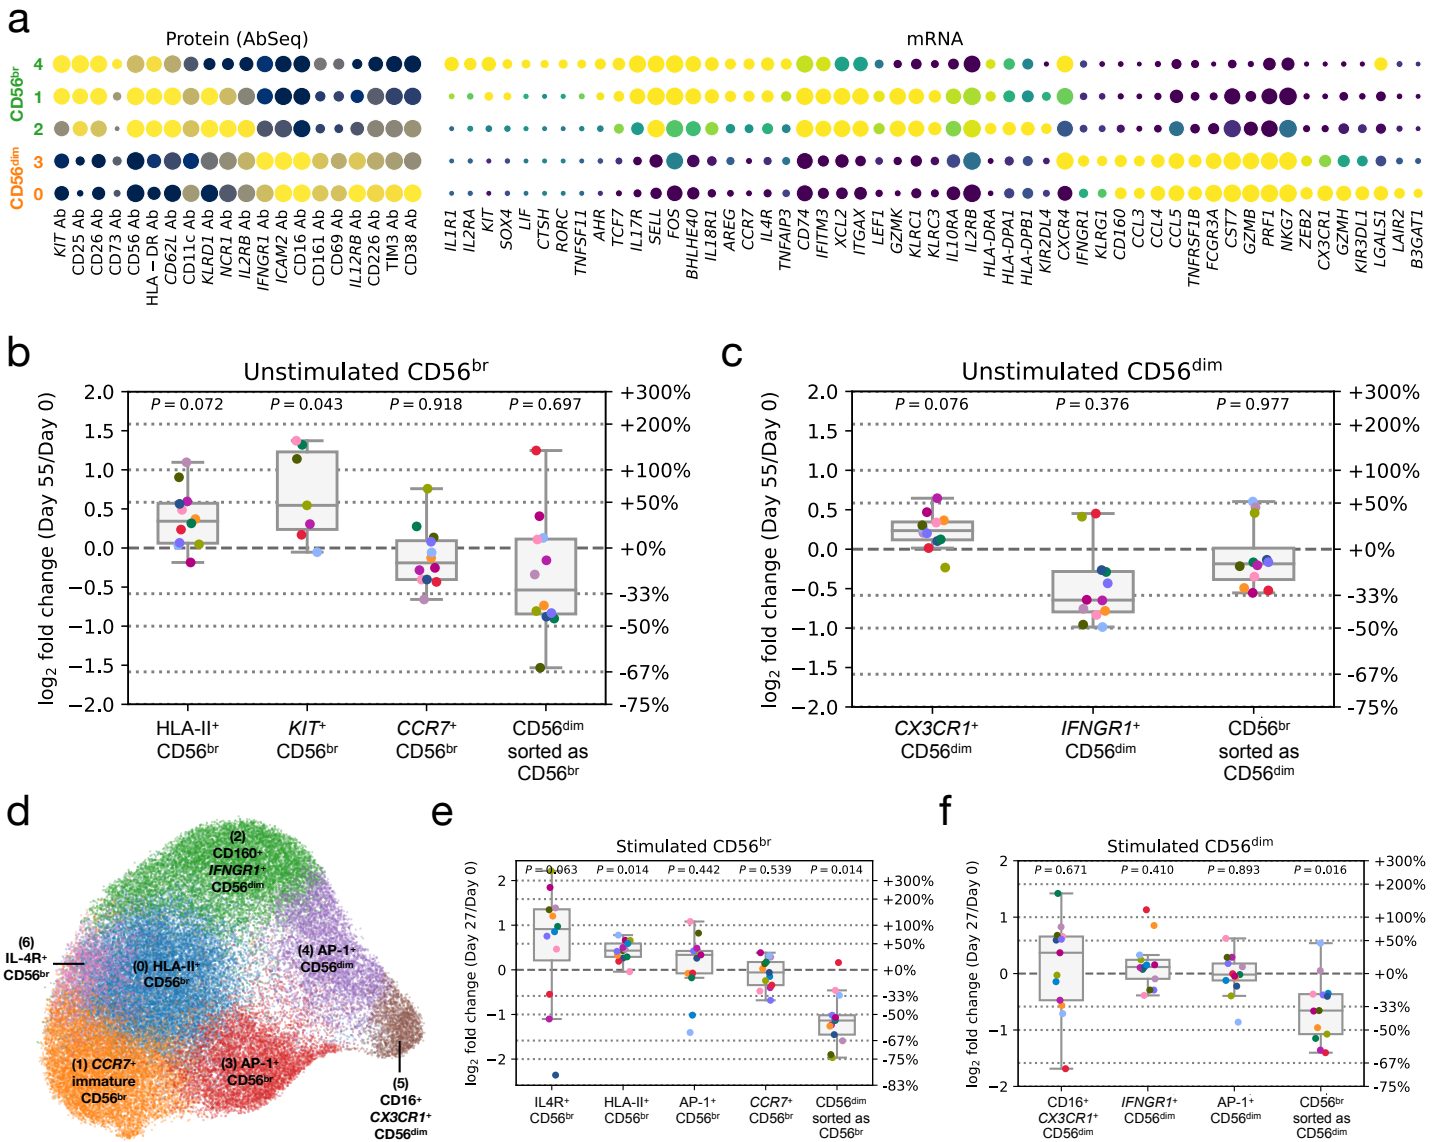

Supplementary Figure 14. Functional annotation of CD56<sup>+</sup> NK cells.

**a**, Expression of selected differentially-expressed markers delineating the five functional subsets identified from the clustering of the 99,169 unstimulated CD56<sup>+</sup> NK cells profiled in this study. The size of the dots represents the frequency of the marker in the respective cluster and the colour brightness represents the relative expression level. Protein markers (AbSeq) are shown on the left section of the plots and mRNA markers on the right section. The dotted red line separates the clusters corresponding to either CD56<sup>br</sup> (top) and CD56<sup>dim</sup> NK cells (bottom). **b-c**, Relative frequency changes of all identified unstimulated CD56<sup>br</sup> (**b**) and CD56<sup>dim</sup> (**c**) NK cell clusters on Day 55 compared to the baseline pre-treatment levels. **d**, UMAP plot depicts the clustering of in vitro stimulated CD56<sup>+</sup> NK cells. **e-f** Relative frequency changes of all identified clusters of cells sorted from either the CD56<sup>br</sup> (**e**) or CD56<sup>dim</sup> (**f**) NK cell gates following in vitro stimulation on Day 27 compared to the baseline pre-treatment (Day 0) levels. In **b, c, e, and f**, each box ranges from the first quartile (Q1) to the third quartile (Q3), with a central line indicating the median. The bottom and top whiskers extend to the most extreme data points within  $Q1 - 1.5 \times (Q3 - Q1)$  and  $Q3 + 1.5 \times (Q3 - Q1)$ , respectively. Each participant is represented by

a different colour, as defined in Supplementary Figure 2b.  $n = 13$  participants. Source data for **b**, **c**, **e**, **f** are provided as a Source Data file.

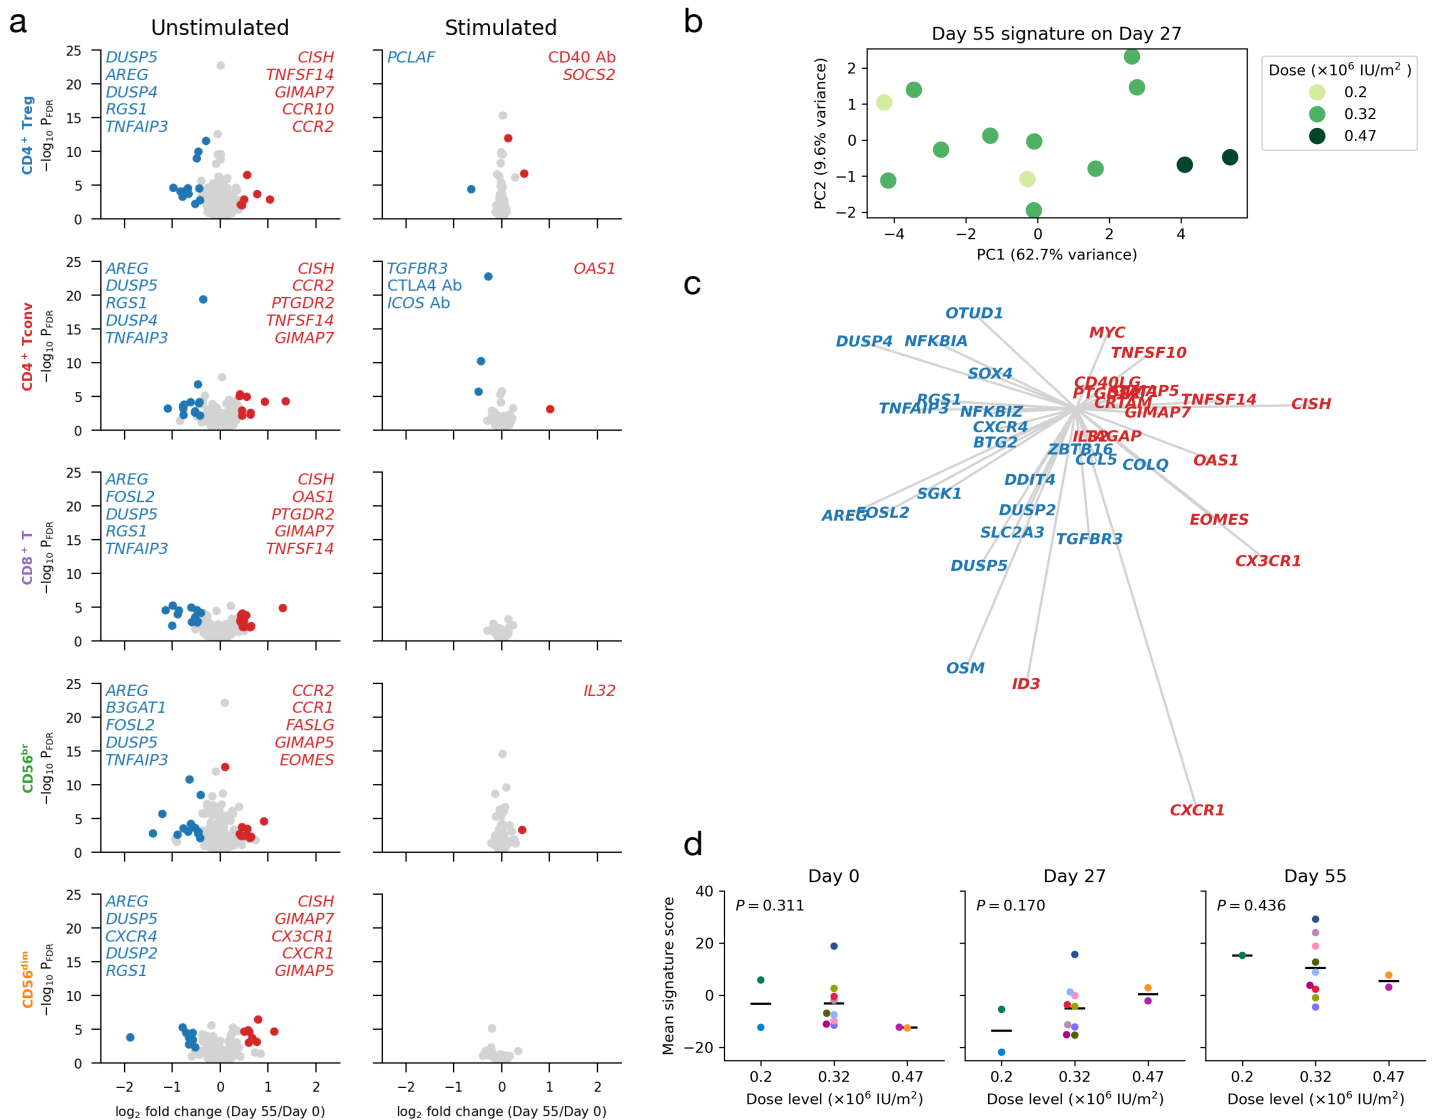

**Supplementary Figure 15. Induction of the anti-inflammatory gene expression signature at Day 55 is IL-2 dose-dependent and is detected in all T and NK cell populations.**

**a**, Volcano plots depicting gene expression changes between Day 0 and Day 55 for the five assessed immune populations, for unstimulated (left panels) and stimulated (right panels) cells. Significantly differentially expressed genes are coloured in red (upregulated genes) or blue (downregulated genes). The top five up- and downregulated genes (as defined by fold change) are labelled on each panel. Fold change and P values were calculated using a generalized linear model implemented in DESeq2 (see Methods). **b**, Principal component analysis (PCA) correlating gene expression changes with dose levels. PCA was performed on log<sub>2</sub> fold-change values of Day 55 signature genes on Day 27 in CD8<sup>+</sup> T cells. Each dot represents a participant, with colours indicating IL-2 dose levels. Vectors representing the gene loading scores of PC1 and PC2 are shown on the right panel, with genes up- and downregulated on Day 55 shown in red and blue, respectively. **c**, Day 55 signature scores by participant for each time point. Each participant is represented by a different colour. **d**, Day 55 signature scores plotted against IL-2 dose. The average value of the Day 55 signature score in the five cell types is shown for each participant. Each participant is represented by a different colour, as defined in Supplementary Figure 2b. n = 13

participants. *P* values were calculated using linear regression, without multiple-comparison adjustments. Source data for **a-d** are provided as a Source Data file.
