# Supplementary material for: Low-dose IL-2 reduces IL-21+ T cell frequency and induces anti-inflammatory gene expression in type 1 diabetes
Source: PubMed Central journal article supplement (PMC9705541; doi:10.1038/s41467-022-34162-3), 2022-11-28
Supplement: 41467_2022_34162_MOESM3_ESM.pdf [file 41467_2022_34162_MOESM3_ESM.pdf]

## **Description of Additional Supplementary Files**

File Name: Supplementary Data 1

Description: Summary of the baseline characteristics of study participants.

File Name: Supplementary Data 2

Description: Complete list of antibodies used in this study and gene content of the scRNA-seq targeted mRNA panel.

File Name: Supplementary Data 3

Description: Summary of the cluster-specific RNA and AbSeq markers used for cell type annotation. Fold change and *P* values were calculated using a negative binomial generalized linear model implemented in Seurat (see Methods).

File Name: Supplementary Data 4

Description: Differential expression calculated on all annotated clusters between Day 0 and Day 27 or Day 55 analysed using DESeq2. Fold change and *P* values were calculated using a generalized linear model implemented in DESeq2 (see Methods).
